# Supplementary material for: Association of Lipoprotein(a) Levels With Incidence of Major Adverse Limb Events
Source: PubMed Central journal article supplement (PMC9856359; doi:10.1001/jamanetworkopen.2022.45720), 2022-12-08
Supplement: jamanetwopen-e2245720-s001.pdf [file jamanetwopen-e2245720-s001.pdf]

## Supplemental Online Content

Guédon AF, De Freminville J-B, Mirault T, et al. Association of lipoprotein(a) levels with incidence of major adverse limb events. *JAMA Netw Open*. 2022;5(12):e2245720. doi:10.1001/jamanetworkopen.2022.45720

**eTable 1.** Sensitivity Analyses With the Primary Outcome Models, Adding Hypolipemiant Drug Status on Patients With Available Data

**eTable 2.** Sensitivity Analyses With the Primary Outcome Models, Adding Time Effect Variable

**eTable 3.** Sensitivity Analyses With the Primary Outcome Models, Adding PAD, History of Ischaemic Heart Disease and History of Stroke

**eTable 4.** Baseline Characteristics According to Subgroups

**eTable 5.** Accelerated Failure Time (AFT) Models With MALE as the Outcome Variable

**eTable 6.** Accelerated Failure Time (AFT) Models With Major Amputation as the Outcome Variable

**eTable 7.** Accelerated Failure Time (AFT) Models With Peripheral Endovascular Revascularization as the Outcome Variable

**eTable 8.** Accelerated Failure Time (AFT) Models With Peripheral Surgical Revascularization as the Outcome Variable

**eTable 9.** *P*-values Included in the Benjamini-Hochberg False Discovery Rate Approach

**eFigure 1.** Frequency Distribution of Lipoprotein(a) [Lp(a)] in All Patients

**eFigure 2.** Kaplan-Meier Survival Curves of the Cumulative Incidence of Major Amputation by Lp(a) Levels

**eFigure 3.** Kaplan-Meier Survival Curves of the Cumulative Incidence of Peripheral Endovascular Revascularization by Lp(a) Levels

**eFigure 4.** Kaplan-Meier Survival Curves of the Cumulative Incidence of Peripheral Surgical Revascularization by Lp(a) Levels

**eFigure 5.** Distribution of Patients by Hospitalization Unit and Lp(a) Levels at Inclusion

**eMethods 1.** List of ICD-10 Used for Comorbidities Definitions

**eMethods 2.** List of CCAM (French Common Classification of Medical Procedures) Used for Outcomes Definitions

This supplemental material has been provided by the authors to give readers additional information about their work.

**eTable 1. Sensitivity Analyses With the Primary Outcome Models, Adding Hypolipemiant Drug Status on Patients With Available Data**

| <b>MALE outcome AFT models - log(Lp(a)) adjusted with hypolipemiant drugs</b>      |                                          |                |                            |                                               |
|------------------------------------------------------------------------------------|------------------------------------------|----------------|----------------------------|-----------------------------------------------|
| <b>Variable</b>                                                                    | <b>Adjusted AFT Exponential Estimate</b> | <b>CI 95%</b>  | <b>Uncorrected p-value</b> | <b>Benjamini - Hochberg corrected p-value</b> |
| Log[Lp(a)]                                                                         | 0.69                                     | [0.53 ; 0.89]  | 0.0043081                  | 0,00710836                                    |
| Age, y                                                                             | 0.94                                     | [0.92 ; 0.96]  | 0.0000001                  | 0,00000025                                    |
| Male sex                                                                           | 0.42                                     | [0.22 ; 0.83]  | 0.0117312                  | 0,01738026                                    |
| Log(Serum creatinine)                                                              | 1.43                                     | [0.81 ; 2.53]  | 0.2141561                  | 0,23380689                                    |
| History of smoking (former or current)                                             | 0.18                                     | [0.10 ; 0.34]  | 0.0000002                  | 0,00000050                                    |
| Diabetes mellitus                                                                  | 0.10                                     | [0.05 ; 0.19]  | 0.0000001                  | 0,00000025                                    |
| LDL cholesterol                                                                    | 2.34                                     | [1.72 ; 3.19]  | 0.0000001                  | 0,00000025                                    |
| Arterial hypertension                                                              | 1.05                                     | [0.54 ; 2.01]  | 0.8900296                  | 0,90838073                                    |
| Dialysis                                                                           | 0.36                                     | [0.01 ; 13.22] | 0.5790493                  | 0,60343032                                    |
| Hypolipemiant drugs                                                                | 0.05                                     | [0.02 ; 0.10]  | 0.0000001                  | 0,00000025                                    |
| <b>MALE outcome AFT models - Lp(a) threshold adjusted with hypolipemiant drugs</b> |                                          |                |                            |                                               |
| <b>Variable</b>                                                                    | <b>Adjusted AFT Exponential Estimate</b> | <b>CI 95%</b>  | <b>Uncorrected p-value</b> | <b>Benjamini - Hochberg corrected p-value</b> |
| High Lp(a) <sup>a</sup>                                                            | 0.81                                     | [0.41 ; 1.59]  | 0.5394637                  | 0,56815858                                    |
| Very High Lp(a) <sup>a</sup>                                                       | 0.33                                     | [0.11 ; 0.94]  | 0.0389911                  | 0,05216377                                    |
| Age, y                                                                             | 0.94                                     | [0.92 ; 0.96]  | 0.0000001                  | 0,00000025                                    |
| Male sex                                                                           | 0.43                                     | [0.22 ; 0.84]  | 0.0138744                  | 0,01970963                                    |
| Log(Serum creatinine)                                                              | 1.37                                     | [0.78 ; 2.41]  | 0.2721395                  | 0,29284577                                    |
| History of smoking (former or current)                                             | 0.19                                     | [0.10 ; 0.36]  | 0.0000003                  | 0,00000072                                    |
| Diabetes mellitus                                                                  | 0.09                                     | [0.05 ; 0.19]  | 0.0000001                  | 0,00000025                                    |
| LDL cholesterol                                                                    | 2.29                                     | [1.69 ; 3.12]  | 0.0000001                  | 0,00000025                                    |
| Arterial hypertension                                                              | 1.02                                     | [0.53 ; 1.97]  | 0.9465362                  | 0,94653620                                    |
| Dialysis                                                                           | 0.40                                     | [0.01 ; 14.40] | 0.6127007                  | 0,63184760                                    |
| Hypolipemiant drugs                                                                | 0.05                                     | [0.02 ; 0.10]  | 0.0000001                  | 0,00000025                                    |

<sup>a</sup>Compared with Normal Lp(a) as reference variable

AFT: Accelerated Failure Time ; CI: confidence interval LDL: low density lipoprotein ; Lp(a): Lipoprotein(a) ; MALE: Major Adverse Limb Events

**eTable 2. Sensitivity Analyses With the Primary Outcome Models, Adding Time Effect Variable**

| <b>MALE outcome AFT models - Log[Lp(a)] non adjusted with time effect</b>      |                                                      |                            |                                              |
|--------------------------------------------------------------------------------|------------------------------------------------------|----------------------------|----------------------------------------------|
| <b>Variable</b>                                                                | <b>Non adjusted AFT Exponential Estimate [CI95%]</b> | <b>Uncorrected p-value</b> | <b>Benjamini-Hochberg corrected p-value</b>  |
| Log[Lp(a)]                                                                     | 0.66 [0.53 ; 0.82]                                   | 0.0001385                  | 0,00027423                                   |
| Time effect                                                                    | 19.41 [11.48 ; 32.82]                                | 0.0000001                  | 0,00000025                                   |
| <b>MALE outcome AFT models - Lp(a) threshold non adjusted with time effect</b> |                                                      |                            |                                              |
| <b>Variable</b>                                                                | <b>Non adjusted AFT Exponential Estimate [CI95%]</b> | <b>Uncorrected p-value</b> | <b>Benjamini-Hochberg corrected p-value</b>  |
| High Lp(a) <sup>a</sup>                                                        | 0.55 [0.31 ; 0.99]                                   | 0.0459982                  | 0,06071762                                   |
| Very High Lp(a) <sup>a</sup>                                                   | 0.28 [0.12 ; 0.66]                                   | 0.0038727                  | 0,00661030                                   |
| Time effect                                                                    | 19.30 [11.41 ; 32.67]                                | 0.0000001                  | 0,00000025                                   |
| <b>MALE outcome AFT models - Log[Lp(a)] adjusted with time effect</b>          |                                                      |                            |                                              |
| <b>Variable</b>                                                                | <b>Adjusted AFT Exponential Estimate [CI95%]</b>     | <b>Uncorrected p-value</b> | <b>Benjamini -Hochberg corrected p-value</b> |
| Log[Lp(a)]                                                                     | 0.60 [0.49 ; 0.74]                                   | 0.0000014                  | 0,00000315                                   |
| Age, y                                                                         | 0.91 [0.90 ; 0.93]                                   | 0.0000001                  | 0,00000025                                   |
| Male sex                                                                       | 0.44 [0.25 ; 0.76]                                   | 0.0030043                  | 0,00521799                                   |
| Log(Serum creatinine)                                                          | 0.69 [0.40 ; 1.17]                                   | 0.1664505                  | 0,18725681                                   |
| History of smoking (former or current)                                         | 0.19 [0.12 ; 0.32]                                   | 0.0000001                  | 0,00000025                                   |
| Diabetes mellitus                                                              | 0.07 [0.04 ; 0.12]                                   | 0.0000001                  | 0,00000025                                   |
| LDL cholesterol                                                                | 4.90 [3.71 ; 6.47]                                   | 0.0000001                  | 0,00000025                                   |
| Arterial hypertension                                                          | 1.90 [1.15 ; 3.14]                                   | 0.0117624                  | 0,01738026                                   |
| Dialysis                                                                       | 0.08 [0.01 ; 1.00]                                   | 0.0504431                  | 0,06485541                                   |
| Time effect                                                                    | 9.63 [5.89 ; 15.74]                                  | 0.0000001                  | 0,00000025                                   |
| <b>MALE outcome AFT models - Lp(a) threshold adjusted with time effect</b>     |                                                      |                            |                                              |
| <b>Variable</b>                                                                | <b>Adjusted AFT Exponential Estimate [CI95%]</b>     | <b>Uncorrected p-value</b> | <b>Benjamini -Hochberg corrected p-value</b> |
| High Lp(a) <sup>a</sup>                                                        | 0.46 [0.26 ; 0.80]                                   | 0.0063386                  | 0,01012131                                   |
| Very High Lp(a) <sup>a</sup>                                                   | 0.23 [0.10 ; 0.54]                                   | 0.0005987                  | 0,00113983                                   |
| Age, y                                                                         | 0.91 [0.90 ; 0.93]                                   | 0.0000001                  | 0,00000025                                   |
| Male sex                                                                       | 0.45 [0.26 ; 0.78]                                   | 0.0041064                  | 0,00689040                                   |
| Log(Serum creatinine)                                                          | 0.66 [0.39 ; 1.13]                                   | 0.1313049                  | 0,15811600                                   |
| History of smoking (former or current)                                         | 0.20 [0.12 ; 0.32]                                   | 0.0000001                  | 0,00000025                                   |
| Diabetes mellitus                                                              | 0.06 [0.04 ; 0.12]                                   | 0.0000001                  | 0,00000025                                   |
| LDL cholesterol                                                                | 4.81 [3.65 ; 6.35]                                   | 0.0000001                  | 0,00000025                                   |
| Arterial hypertension                                                          | 1.88[1.14 ; 3.10]                                    | 0.0139361                  | 0,01970963                                   |
| Dialysis                                                                       | 0.08 [0.01 ; 0.98]                                   | 0.0480577                  | 0,06260148                                   |
| Time effect                                                                    | 9.56 [5.84 ; 15.65]                                  | 0.0000001                  | 0,00000025                                   |

<sup>a</sup>Compared with Normal Lp(a) as reference variable

AFT: Accelerated Failure Time ; CI: confidence interval LDL: low density lipoprotein ; Lp(a): Lipoprotein(a) ; MALE: Major Adverse Limb Events

Time effect is defined as the binary variable inclusion time before or after the median inclusion time of follow up cohort, set to September 29, 2011

**eTable 3.** Sensitivity Analyses With the Primary Outcome Models, Adding PAD, History of Ischaemic Heart Disease and History of Stroke

| <b>MALE outcome AFT models - Log[Lp(a)] adjusted with PAD</b>                                |                                          |                   |                            |                                             |
|----------------------------------------------------------------------------------------------|------------------------------------------|-------------------|----------------------------|---------------------------------------------|
| <b>Variable</b>                                                                              | <b>Adjusted AFT Exponential Estimate</b> | <b>CI95%</b>      | <b>Uncorrected p-value</b> | <b>Benjamini-Hochberg corrected p-value</b> |
| Log[Lp(a)]                                                                                   | 0.82                                     | [0.69 ; 0.97]     | 0.0192676                  | 0.02686609                                  |
| Age, y                                                                                       | 0.96                                     | [0.95 ; 0.98]     | 0.0000044                  | 0.00000947                                  |
| Male sex                                                                                     | 0.73                                     | [0.47 ; 1.15]     | 0.1708286                  | 0.19002282                                  |
| Log(Serum creatinine)                                                                        | 0.76                                     | [0.49 ; 1.17]     | 0.2149134                  | 0.23380689                                  |
| History of smoking (former or current)                                                       | 0.59                                     | [0.38 ; 0.89]     | 0.0126084                  | 0.01835635                                  |
| Diabetes mellitus                                                                            | 0.19                                     | [0.12 ; 0.31]     | 0.0000001                  | 0.00000025                                  |
| LDL cholesterol                                                                              | 2.24                                     | [1.81 ; 2.77]     | 0.0000001                  | 0.00000025                                  |
| Arterial hypertension                                                                        | 0.98                                     | [0.64 ; 1.50]     | 0.9285879                  | 0.93806329                                  |
| Dialysis                                                                                     | 0.17                                     | [0.02 ; 1.17]     | 0.0721859                  | 0.09162057                                  |
| PAD                                                                                          | 0.0003                                   | [0.0002 ; 0.0007] | 0.0000001                  | 0.00000025                                  |
|                                                                                              |                                          |                   |                            |                                             |
|                                                                                              |                                          |                   |                            |                                             |
| <b>MALE outcome AFT models - Log[Lp(a)] adjusted with history of ischaemic heart disease</b> |                                          |                   |                            |                                             |
| <b>Variable</b>                                                                              | <b>Adjusted AFT Exponential Estimate</b> | <b>CI95%</b>      | <b>Uncorrected p-value</b> | <b>Benjamini-Hochberg corrected p-value</b> |
| Log[Lp(a)]                                                                                   | 0.59                                     | [0.47 ; 0.73]     | 0.0000018                  | 0.00000396                                  |
| Age, y                                                                                       | 0.91                                     | [0.89 ; 0.93]     | 0.0000001                  | 0.00000025                                  |
| Male sex                                                                                     | 0.52                                     | [0.29 ; 0.93]     | 0.0279242                  | 0.03839578                                  |
| Log(Serum creatinine)                                                                        | 0.66                                     | [0.37 ; 1.16]     | 0.1500958                  | 0.17481746                                  |
| History of smoking (former or current)                                                       | 0.19                                     | [0.11 ; 0.33]     | 0.0000001                  | 0.00000025                                  |
| Diabetes mellitus                                                                            | 0.05                                     | [0.03 ; 0.10]     | 0.0000001                  | 0.00000025                                  |

|                                                                             |                                          |               |                            |                                             |
|-----------------------------------------------------------------------------|------------------------------------------|---------------|----------------------------|---------------------------------------------|
| LDL cholesterol                                                             | 5.31                                     | [3.95 ; 7.12] | 0.0000001                  | 0.0000002<br>5                              |
| Arterial hypertension                                                       | 2.36                                     | [1.39 ; 4.00] | 0.0014438                  | 0.0026969<br>1                              |
| Dialysis                                                                    | 0.13                                     | [0.01 ; 1.85] | 0.1325619                  | 0.1581160<br>0                              |
| History of ischaemic heart disease                                          | 0.30                                     | [0.17 ; 0.54] | 0.0000740                  | 0.0001495<br>1                              |
|                                                                             |                                          |               |                            |                                             |
|                                                                             |                                          |               |                            |                                             |
| <b>MALE outcome AFT models - Log[Lp(a)] adjusted with history of stroke</b> |                                          |               |                            |                                             |
| <b>Variable</b>                                                             | <b>Adjusted AFT Exponential Estimate</b> | <b>CI95%</b>  | <b>Uncorrected p-value</b> | <b>Benjamini-Hochberg corrected p-value</b> |
| Log[Lp(a)]                                                                  | 0.57                                     | [0.46 ; 0.71] | 0.0000004                  | 0.0000009<br>2                              |
| Age, y                                                                      | 0.90                                     | [0.89 ; 0.92] | 0.0000001                  | 0.0000002<br>5                              |
| Male sex                                                                    | 0.46                                     | [0.26 ; 0.81] | 0.0071492                  | 0.0110589<br>2                              |
| Log(Serum creatinine)                                                       | 0.66                                     | [0.37 ; 1.17] | 0.1531036                  | 0.1762471<br>7                              |
| History of smoking (former or current)                                      | 0.17                                     | [0.01 ; 0.29] | 0.0000001                  | 0.0000002<br>5                              |
| Diabetes mellitus                                                           | 0.05                                     | [0.03 ; 0.09] | 0.0000001                  | 0.0000002<br>5                              |
| LDL cholesterol                                                             | 5.69                                     | [4.23 ; 7.63] | 0.0000001                  | 0.0000002<br>5                              |
| Arterial hypertension                                                       | 2.32                                     | [1.37 ; 3.93] | 0.0017542                  | 0.0031896<br>0                              |
| Dialysis                                                                    | 0.13                                     | [0.01 ; 1.74] | 0.1223558                  | 0.1495459<br>8                              |
| History of stroke                                                           | 0.40                                     | [0.06 ; 2.59] | 0.3368463                  | 0.3585783<br>2                              |

AFT: Accelerated Failure Time ; CI: confidence interval LDL: low density lipoprotein ; Lp(a): Lipoprotein(a) ; MALE: Major Adverse Limb Events; PAD : Peripheral Artery Disease

**eTable 4. Baseline Characteristics According to Subgroups**

|                                          | <b>InDay hospitalization</b> | <b>Conventional hospitalization</b> | <b>Ischemic heart disease</b> | <b>PAD</b>            |
|------------------------------------------|------------------------------|-------------------------------------|-------------------------------|-----------------------|
| number                                   | 13661                        | 2852                                | 2387                          | 1139                  |
| Age, y                                   | 57.89 [49.29, 65.92]         | 60.17 [46.56, 71.96]                | 63.67 [56.36, 71.02]          | 65.07 [55.14, 74.87]  |
| Male sex, n (%)                          | 8042 (58.9)                  | 1732 ( 60.7)                        | 1842 ( 77.2)                  | 799 ( 70.1)           |
| Peripheral artery disease, n (%)         | 311 ( 2.3)                   | 828 ( 29.0)                         | 338 ( 14.2)                   | 1139 (100.0)          |
| Ischemic heart disease, n (%)            | 1753 (12.8)                  | 634 ( 22.2)                         | 2387 (100.0)                  | 338 ( 29.7)           |
| History of stroke, n (%)                 | 58 ( 0.4)                    | 146 ( 5.1)                          | 57 ( 2.4)                     | 33 ( 2.9)             |
| Arterial hypertension, n (%)             | 7621 (55.8)                  | 1441 ( 50.5)                        | 1456 ( 61.0)                  | 612 ( 53.7)           |
| Cigarette use, n (%)                     |                              |                                     |                               |                       |
| <i>Never smoked</i>                      | 9368 (68.6)                  | 1981 ( 69.5)                        | 1353 ( 56.7)                  | 646 ( 56.7)           |
| <i>Former smoker</i>                     | 2589 (19.0)                  | 181 ( 6.3)                          | 576 ( 24.1)                   | 146 ( 12.8)           |
| <i>Current smoker</i>                    | 1704 (12.5)                  | 690 ( 24.2)                         | 458 ( 19.2)                   | 347 ( 30.5)           |
| Dyslipidemia, n (%)                      | 8743 (64.0)                  | 1759 ( 61.7)                        | 1960 ( 82.1)                  | 835 ( 73.3)           |
| Diabetes mellitus, n (%)                 | 1553 (11.4)                  | 593 ( 20.8)                         | 544 ( 22.8)                   | 320 ( 28.1)           |
| Dialysis, n (%)                          | 51 ( 0.4)                    | 24 ( 0.8)                           | 10 ( 0.4)                     | 7 ( 0.6)              |
| Lp(a), mg/dL                             | 24.00 [10.00, 58.00]         | 29.00 [11.00, 65.00]                | 28.00 [11.00, 69.00]          | 30.00 [12.00, 70.50]  |
| Lp(a) threshold, n (%)                   |                              |                                     |                               |                       |
| <i>Normal</i>                            | 9720 (71.2)                  | 1901 ( 66.7)                        | 1548 ( 64.9)                  | 726 ( 63.7)           |
| <i>High</i>                              | 3322 (24.3)                  | 749 ( 26.3)                         | 681 ( 28.5)                   | 313 ( 27.5)           |
| <i>Very high</i>                         | 619 ( 4.5)                   | 202 ( 7.1)                          | 158 ( 6.6)                    | 100 ( 8.8)            |
| LDL cholesterol, mmol/L                  | 3.14 [2.48, 3.85]            | 2.64 [1.99, 3.37]                   | 2.56 [1.94, 3.37]             | 2.42 [1.76, 3.16]     |
| HDL cholesterol, mmol/L                  | 1.29 [1.06, 1.57]            | 1.14 [0.92, 1.41]                   | 1.16 [0.95, 1.42]             | 1.13 [0.91, 1.38]     |
| Total cholesterol, mmol/L                | 5.12 [4.37, 5.94]            | 4.55 [3.74, 5.43]                   | 4.49 [3.74, 5.42]             | 4.32 [3.53, 5.21]     |
| Triglycerides, mmol/L                    | 1.17 [0.84, 1.70]            | 1.35 [0.98, 1.90]                   | 1.32 [0.95, 1.84]             | 1.37 [1.03, 1.89]     |
| Serum creatinine, $\mu$ mol/L            | 80.00 [68.00, 95.00]         | 83.00 [65.25, 115.00]               | 84.00 [72.00, 101.00]         | 83.00 [66.00, 110.00] |
| Measured GFR, mL/min/1.73 m <sup>2</sup> | 80.00 [67.00, 92.00]         | 76.00 [52.00, 98.00]                | 77.00 [63.00, 90.00]          | 75.00 [53.00, 97.00]  |
| Proteinuria Ur, g/L                      | 0.12 [0.08, 0.18]            | 0.12 [0.06, 0.33]                   | 0.12 [0.08, 0.19]             | 0.12 [0.06, 0.26]     |
| Conjugated bilirubin, $\mu$ mol/L        | 3.00 [2.00, 4.00]            | 5.00 [4.00, 8.00]                   | 4.00 [3.00, 5.00]             | 5.00 [4.00, 9.00]     |
| Total bilirubin, $\mu$ mol/L             | 12.00 [9.00, 16.00]          | 10.00 [8.00, 14.00]                 | 12.00 [9.00, 16.00]           | 10.00 [7.00, 14.00]   |
| Gamma-glutamyltransferase, U/L           | 21.00 [13.00, 35.00]         | 28.00 [16.00, 57.00]                | 25.00 [15.00, 43.00]          | 30.00 [18.00, 57.00]  |
| Alkaline phosphatase, (median [IQR])     | 59.00 [49.00, 72.00]         | 70.00 [56.00, 90.00]                | 61.00 [51.00, 75.00]          | 70.00 [57.00, 90.00]  |
| Alanine aminotransferase, U/L            | 21.00 [15.00, 30.00]         | 19.00 [13.00, 30.00]                | 22.00 [15.00, 33.00]          | 18.00 [13.00, 28.00]  |
| Aspartate aminotransferase, U/L          | 21.00 [17.00, 26.00]         | 22.00 [17.00, 29.00]                | 22.00 [18.00, 28.00]          | 21.00 [17.00, 28.00]  |
| Serum albumin, g/L                       | 39.00 [36.90, 41.27]         | 34.00 [28.00, 38.50]                | 34.95 [29.00, 38.00]          | 34.50 [29.00, 38.00]  |
| Hypolipemiant drugs, n/total n (%)       |                              | 1520 ( 53.3)                        | 471 ( 74.3)                   | 628 ( 75.8)           |

HDL : high density lipoprotein ; LDL: low density lipoprotein ; Lp(a): Lipoprotein(a) ; PAD : Peripheral Artery Disease

*Data regarding hypolipemiant drugs were not available for InDay hospitalization patients.*

**eTable 5.** Accelerated Failure Time (AFT) Models With MALE as the Outcome Variable

| <b>MALE outcome AFT models - Log[Lp(a)] non adjusted</b>      |                                                      |                            |                                               |
|---------------------------------------------------------------|------------------------------------------------------|----------------------------|-----------------------------------------------|
| <b>Variable</b>                                               | <b>Non adjusted AFT Exponential Estimate [CI95%]</b> | <b>Uncorrected p-value</b> | <b>Benjamini-Hochberg corrected p-value</b>   |
| Log[Lp(a)]                                                    | 0.61 [0.48 ; 0.76]                                   | 0.000018                   | 0,00003791                                    |
| <b>MALE outcome AFT models - Lp(a) threshold non adjusted</b> |                                                      |                            |                                               |
| <b>Variable</b>                                               | <b>Non adjusted AFT Exponential Estimate [CI95%]</b> | <b>Uncorrected p-value</b> | <b>Benjamini - Hochberg corrected p-value</b> |
| High Lp(a) <sup>a</sup>                                       | 0.50 [0.27 ; 0.93]                                   | 0.029354                   | 0,03980885                                    |
| Very High Lp(a) <sup>a</sup>                                  | 0.18 [0.07 ; 0.44]                                   | 0.000229                   | 0,00044453                                    |
| <b>MALE outcome AFT models - Log[Lp(a)] adjusted</b>          |                                                      |                            |                                               |
| <b>Variable</b>                                               | <b>Adjusted AFT Exponential Estimate [CI95%]</b>     | <b>Uncorrected p-value</b> | <b>Benjamini - Hochberg corrected p-value</b> |
| Log[Lp(a)]                                                    | 0.57 [0.46 ; 0.71]                                   | 0.0000004                  | 0,00000092                                    |
| Age, y                                                        | 0.90 [0.88 ; 0.92]                                   | 0.0000001                  | 0,00000025                                    |
| Male sex                                                      | 0.46 [0.26 ; 0.81]                                   | 0.0071317                  | 0,01105892                                    |
| Log(Serum creatinine)                                         | 0.67 [0.38 ; 1.18]                                   | 0.1640512                  | 0,18667895                                    |
| History of smoking (former or current)                        | 0.17 [0.10 ; 0.29]                                   | 0.0000001                  | 0,00000025                                    |
| Diabetes mellitus                                             | 0.05 [0.03 ; 0.09]                                   | 0.0000001                  | 0,00000025                                    |
| LDL cholesterol                                               | 5.71 [4.25 ; 7.68]                                   | 0.0000001                  | 0,00000025                                    |
| Arterial hypertension                                         | 2.32 [1.37 ; 3.93]                                   | 0.0017720                  | 0,00318960                                    |
| Dialysis                                                      | 0.12 [0.01 ; 1.72]                                   | 0.1200630                  | 0,14857796                                    |
| <b>MALE outcome AFT models - Lp(a) threshold adjusted</b>     |                                                      |                            |                                               |
| <b>Variable</b>                                               | <b>Adjusted AFT Exponential Estimate [CI95%]</b>     | <b>Uncorrected p-value</b> | <b>Benjamini - Hochberg corrected p-value</b> |
| High Lp(a) <sup>a</sup>                                       | 0.43 [0.24 ; 0.78]                                   | 0.0051709                  | 0,00839212                                    |
| Very High Lp(a) <sup>a</sup>                                  | 0.17 [0.07 ; 0.40]                                   | 0.0000664                  | 0,00013695                                    |
| Age, y                                                        | 0.90 [0.89 ; 0.92]                                   | 0.0000001                  | 0,00000025                                    |
| Male sex                                                      | 0.47 [0.26 ; 0.83]                                   | 0.0089485                  | 0,01362925                                    |
| Log(Serum creatinine)                                         | 0.65 [0.37 ; 1.14]                                   | 0.1345821                  | 0,15861462                                    |
| History of smoking (former or current)                        | 0.17 [0.10 ; 0.29]                                   | 0.0000001                  | 0,00000025                                    |
| Diabetes mellitus                                             | 0.05 [0.03 ; 0.09]                                   | 0.0000001                  | 0,00000025                                    |
| LDL cholesterol                                               | 5.61 [4.18 ; 7.53]                                   | 0.0000001                  | 0,00000025                                    |
| Arterial hypertension                                         | 2.29 [1.35 ; 3.88]                                   | 0.0021335                  | 0,00377172                                    |
| Dialysis                                                      | 0.12 [0.01 ; 1.69]                                   | 0.1164028                  | 0,14587186                                    |

<sup>a</sup>Compared with Normal Lp(a) as reference variable

AFT: Accelerated Failure Time; CI: confidence interval LDL: low density lipoprotein; Lp(a): Lipoprotein(a); MALE: Major Adverse Limb Events



**eTable 6.** Accelerated Failure Time (AFT) Models With Major Amputation as the Outcome Variable

| <b>Major amputation outcome AFT models - Log[Lp(a)] non adjusted</b>      |                                              |                |                            |
|---------------------------------------------------------------------------|----------------------------------------------|----------------|----------------------------|
| <b>Variable</b>                                                           | <b>Non adjusted AFT Exponential Estimate</b> | <b>CI95%</b>   | <b>Uncorrected p-value</b> |
| Log[Lp(a)]                                                                | 0.56                                         | [0.35 ; 0.91]  | 0.0184829                  |
| <b>Major amputation outcome AFT models - Lp(a) threshold non adjusted</b> |                                              |                |                            |
| <b>Variable</b>                                                           | <b>Non adjusted AFT Exponential Estimate</b> | <b>CI95%</b>   | <b>Uncorrected p-value</b> |
| High Lp(a) <sup>a</sup>                                                   | 0.42                                         | [0.12 ; 1.41]  | 0.1601924                  |
| Very High Lp(a) <sup>a</sup>                                              | 0.22                                         | [0.03 ; 1.96]  | 0.1755513                  |
| <b>Major amputation outcome AFT models - Log[Lp(a)] adjusted</b>          |                                              |                |                            |
| <b>Variable</b>                                                           | <b>Adjusted AFT Exponential Estimate</b>     | <b>CI95%</b>   | <b>Uncorrected p-value</b> |
| Log[Lp(a)]                                                                | 0.62                                         | [0.40 ; 0.98]  | 0.0406164                  |
| Age, y                                                                    | 0.95                                         | [0.91 ; 0.99]  | 0.0101601                  |
| Male sex                                                                  | 0.30                                         | [0.08 ; 1.09]  | 0.0673985                  |
| Log(Serum creatinine)                                                     | 0.19                                         | [0.07 ; 0.48]  | 0.0005706                  |
| History of smoking (former or current)                                    | 0.88                                         | [0.27 ; 2.81]  | 0.8279230                  |
| Diabetes mellitus                                                         | 0.02                                         | [0.00 ; 0.06]  | 0.0000000                  |
| LDL cholesterol                                                           | 5.98                                         | [3.04 ; 11.77] | 0.0000002                  |
| Arterial hypertension                                                     | 4.56                                         | [1.47 ; 14.15] | 0.0085716                  |
| Dialysis                                                                  | 0.11                                         | [0.00 ; 4.28]  | 0.2380730                  |
| <b>Major amputation outcome AFT models - Lp(a) threshold adjusted</b>     |                                              |                |                            |
| <b>Variable</b>                                                           | <b>Adjusted AFT Exponential Estimate</b>     | <b>CI95%</b>   | <b>Uncorrected p-value</b> |
| High Lp(a) <sup>a</sup>                                                   | 0.41                                         | [0.13 ; 1.32]  | 0.1348754                  |
| Very High Lp(a) <sup>a</sup>                                              | 0.41                                         | [0.05 ; 3.40]  | 0.4078284                  |
| Age, y                                                                    | 0.95                                         | [0.91 ; 0.99]  | 0.0094476                  |
| Male sex                                                                  | 0.31                                         | [0.09 ; 1.13]  | 0.0770335                  |
| Log(Serum creatinine)                                                     | 0.18                                         | [0.07 ; 0.46]  | 0.0004038                  |
| History of smoking (former or current)                                    | 0.88                                         | [0.28 ; 2.84]  | 0.8372066                  |
| Diabetes mellitus                                                         | 0.01                                         | [0.00 ; 0.05]  | 0.0000000                  |
| LDL cholesterol                                                           | 5.94                                         | [3.02 ; 11.69] | 0.0000002                  |
| Arterial hypertension                                                     | 4.47                                         | [1.44 ; 13.88] | 0.0096805                  |
| Dialysis                                                                  | 0.11                                         | [0.00 ; 4.10]  | 0.2282675                  |

<sup>a</sup>Compared with Normal Lp(a) as reference variable

AFT: Accelerated Failure Time; CI: confidence interval LDL: low density lipoprotein; Lp(a): Lipoprotein(a); MALE: Major Adverse Limb Events

**eTable 7. Accelerated Failure Time (AFT) Models With Peripheral Endovascular Revascularization as the Outcome Variable**

| <b>Endovascular revascularization outcome AFT models - Log[Lp(a)] non adjusted</b>      |                                              |               |                            |
|-----------------------------------------------------------------------------------------|----------------------------------------------|---------------|----------------------------|
| <b>Variable</b>                                                                         | <b>Non adjusted AFT Exponential Estimate</b> | <b>CI95%</b>  | <b>Uncorrected p-value</b> |
| Log[Lp(a)]                                                                              | 0.49                                         | [0.37 ; 0.65] | 0.0000007                  |
| <b>Endovascular revascularization outcome AFT models - Lp(a) threshold non adjusted</b> |                                              |               |                            |
| <b>Variable</b>                                                                         | <b>Non adjusted AFT Exponential Estimate</b> | <b>CI95%</b>  | <b>Uncorrected p-value</b> |
| High Lp(a) <sup>a</sup>                                                                 | 0.41                                         | [0.20 ; 0.84] | 0.0153689                  |
| Very High Lp(a) <sup>a</sup>                                                            | 0.07                                         | [0.02 ; 0.24] | 0.0000191                  |
| <b>Endovascular revascularization outcome AFT models - log(Lp(a)) adjusted</b>          |                                              |               |                            |
| <b>Variable</b>                                                                         | <b>Adjusted AFT Exponential Estimate</b>     | <b>CI95%</b>  | <b>Uncorrected p-value</b> |
| Log[Lp(a)]                                                                              | 0.49                                         | [0.37 ; 0.63] | 0.0000001                  |
| Age, y                                                                                  | 0.89                                         | [0.87 ; 0.91] | 0.0000001                  |
| Male sex                                                                                | 0.63                                         | [0.32 ; 1.23] | 0.1765692                  |
| Log(Serum creatinine)                                                                   | 0.39                                         | [0.20 ; 0.74] | 0.0041594                  |
| History of smoking (former or current)                                                  | 0.17                                         | [0.09 ; 0.33] | 0.0000001                  |
| Diabetes mellitus                                                                       | 0.03                                         | [0.02 ; 0.07] | 0.0000001                  |
| LDL cholesterol                                                                         | 6.00                                         | [4.21 ; 8.56] | 0.0000001                  |
| Arterial hypertension                                                                   | 2.03                                         | [1.08 ; 3.81] | 0.0278617                  |
| Dialysis                                                                                | 0.31                                         | [0.01 ; 7.20] | 0.4662040                  |
| <b>Endovascular revascularization outcome AFT models - Lp(a) threshold adjusted</b>     |                                              |               |                            |
| <b>Variable</b>                                                                         | <b>Adjusted AFT Exponential Estimate</b>     | <b>CI95%</b>  | <b>Uncorrected p-value</b> |
| High Lp(a) <sup>a</sup>                                                                 | 0.36                                         | [0.18 ; 0.70] | 0.0027467                  |
| Very High Lp(a) <sup>a</sup>                                                            | 0.09                                         | [0.03 ; 0.29] | 0.0000513                  |
| Age, y                                                                                  | 0.89                                         | [0.87 ; 0.91] | 0.0000000                  |
| Male sex                                                                                | 0.65                                         | [0.33 ; 1.27] | 0.2051801                  |
| Log(Serum creatinine)                                                                   | 0.37                                         | [0.20 ; 0.72] | 0.0029516                  |
| History of smoking (former or current)                                                  | 0.18                                         | [0.09 ; 0.34] | 0.0000001                  |
| Diabetes mellitus                                                                       | 0.03                                         | [0.02 ; 0.07] | 0.0000001                  |
| LDL cholesterol                                                                         | 5.81                                         | [4.08 ; 8.26] | 0.0000001                  |
| Arterial hypertension                                                                   | 2.00                                         | [1.06 ; 3.75] | 0.0317191                  |
| Dialysis                                                                                | 0.30                                         | [0.01 ; 6.86] | 0.4481727                  |

<sup>a</sup>Compared with Normal Lp(a) as reference variable

AFT: Accelerated Failure Time; CI: confidence interval LDL: low density lipoprotein; Lp(a): Lipoprotein(a); MALE: Major Adverse Limb Events

**eTable 8.** Accelerated Failure Time (AFT) Models With Peripheral Surgical Revascularization as the Outcome Variable

| <b>Surgical revascularization outcome AFT models - Log[Lp(a)] non adjusted</b>      |                                              |               |                            |
|-------------------------------------------------------------------------------------|----------------------------------------------|---------------|----------------------------|
| <b>Variable</b>                                                                     | <b>Non adjusted AFT Exponential Estimate</b> | <b>CI95%</b>  | <b>Uncorrected p-value</b> |
| Log[Lp(a)]                                                                          | 0.80                                         | [0.60 ; 1.07] | 0.1341378                  |
| <b>Surgical revascularization outcome AFT models - Lp(a) threshold non adjusted</b> |                                              |               |                            |
| <b>Variable</b>                                                                     | <b>Non adjusted AFT Exponential Estimate</b> | <b>CI95%</b>  | <b>Uncorrected p-value</b> |
| High Lp(a) <sup>a</sup>                                                             | 0.74                                         | [0.34 ; 1.61] | 0.4446194                  |
| Very High Lp(a) <sup>a</sup>                                                        | 0.45                                         | [0.11 ; 1.89] | 0.2747988                  |
| <b>Surgical revascularization outcome AFT models - Log[Lp(a)] adjusted</b>          |                                              |               |                            |
| <b>Variable</b>                                                                     | <b>Adjusted AFT Exponential Estimate</b>     | <b>CI95%</b>  | <b>Uncorrected p-value</b> |
| Log[Lp(a)]                                                                          | 0.72                                         | [0.54 ; 0.95] | 0.0222878                  |
| Age, y                                                                              | 0.93                                         | [0.91 ; 0.96] | 0.0000011                  |
| Male sex                                                                            | 0.30                                         | [0.13 ; 0.67] | 0.0034721                  |
| Log(Serum creatinine)                                                               | 1.70                                         | [0.72 ; 4.01] | 0.2254132                  |
| History of smoking (former or current)                                              | 0.15                                         | [0.07 ; 0.30] | 0.0000002                  |
| Diabetes mellitus                                                                   | 0.24                                         | [0.11 ; 0.55] | 0.0007395                  |
| LDL cholesterol                                                                     | 4.24                                         | [2.85 ; 6.32] | 0.0000000                  |
| Arterial hypertension                                                               | 1.68                                         | [0.84 ; 3.37] | 0.1447163                  |
| Dialysis                                                                            | 0.14                                         | [0.00 ; 5.72] | 0.2998081                  |
| <b>Surgical revascularization outcome AFT models - Lp(a) threshold adjusted</b>     |                                              |               |                            |
| <b>Variable</b>                                                                     | <b>Adjusted AFT Exponential Estimate</b>     | <b>CI95%</b>  | <b>Uncorrected p-value</b> |
| High Lp(a) <sup>a</sup>                                                             | 0.61                                         | [0.28 ; 1.29] | 0.1951324                  |
| Very High Lp(a) <sup>a</sup>                                                        | 0.35                                         | [0.09 ; 1.45] | 0.1481035                  |
| Age, y                                                                              | 0.93                                         | [0.91 ; 0.96] | 0.0000011                  |
| Male sex                                                                            | 0.31                                         | [0.14 ; 0.69] | 0.0040603                  |
| Log(Serum creatinine)                                                               | 1.66                                         | [0.70 ; 3.92] | 0.2456297                  |
| History of smoking (former or current)                                              | 0.15                                         | [0.07 ; 0.31] | 0.0000002                  |
| Diabetes mellitus                                                                   | 0.24                                         | [0.11 ; 0.55] | 0.0006552                  |
| LDL cholesterol                                                                     | 4.20                                         | [2.83 ; 6.26] | 0.0000000                  |
| Arterial hypertension                                                               | 1.67                                         | [0.83 ; 3.35] | 0.1517667                  |
| Dialysis                                                                            | 0.13                                         | [0.00 ; 5.44] | 0.2879857                  |

<sup>a</sup>Compared with Normal Lp(a) as reference variable

AFT: Accelerated Failure Time; CI: confidence interval LDL: low density lipoprotein; Lp(a): Lipoprotein(a); MALE: Major Adverse Limb Events

**eTable 9.** P-values Included in the Benjamini-Hochberg False Discovery Rate Approach

| AFT model                                                                 | Variable                               | Uncorrected p-value | Benjamini-Hochberg corrected p-value |
|---------------------------------------------------------------------------|----------------------------------------|---------------------|--------------------------------------|
| Unadjusted AFT model with Log[Lp(a)] (outcome MALE)                       | Log[Lp(a)]                             | 0.000018            | 0,00003791                           |
| Unadjusted AFT model with Lp(a) threshold (outcome MALE)                  | High Lp(a) <sup>a</sup>                | 0.029354            | 0,03980885                           |
|                                                                           | Very High Lp(a) <sup>a</sup>           | 0.000229            | 0,00044453                           |
| Adjusted AFT model with Log[Lp(a)] (outcome MALE)                         | Log[Lp(a)]                             | 0.0000004           | 0,00000092                           |
|                                                                           | Age, y                                 | 0.0000001           | 0,00000025                           |
|                                                                           | Male sex                               | 0.0071317           | 0,01105892                           |
|                                                                           | Log(Serum creatinine)                  | 0.1640512           | 0,18667895                           |
|                                                                           | History of smoking (former or current) | 0.0000001           | 0,00000025                           |
|                                                                           | Diabetes mellitus                      | 0.0000001           | 0,00000025                           |
|                                                                           | LDL cholesterol                        | 0.0000001           | 0,00000025                           |
|                                                                           | Arterial hypertension                  | 0.0017720           | 0,00318960                           |
|                                                                           | Dialysis                               | 0.1200630           | 0,14857796                           |
| Adjusted AFT model with Lp(a) threshold (outcome MALE)                    | High Lp(a) <sup>a</sup>                | 0.0051709           | 0,00839212                           |
|                                                                           | Very High Lp(a) <sup>a</sup>           | 0.0000664           | 0,00013695                           |
|                                                                           | Age, y                                 | 0.0000001           | 0,00000025                           |
|                                                                           | Male sex                               | 0.0089485           | 0,01362925                           |
|                                                                           | Log(Serum creatinine)                  | 0.1345821           | 0,15861462                           |
|                                                                           | History of smoking (former or current) | 0.0000001           | 0,00000025                           |
|                                                                           | Diabetes mellitus                      | 0.0000001           | 0,00000025                           |
|                                                                           | LDL cholesterol                        | 0.0000001           | 0,00000025                           |
|                                                                           | Arterial hypertension                  | 0.0021335           | 0,00377172                           |
|                                                                           | Dialysis                               | 0.1164028           | 0,14587186                           |
| Unadjusted AFT model with Log[Lp(a)] (outcome MALE) with time effect      | Log[Lp(a)]                             | 0.0001385           | 0,00027423                           |
|                                                                           | Time effect                            | 0.0000001           | 0,00000025                           |
| Unadjusted AFT model with Lp(a) threshold (outcome MALE) with time effect | High Lp(a) <sup>a</sup>                | 0.0459982           | 0,06071762                           |
|                                                                           | Very High Lp(a) <sup>a</sup>           | 0.0038727           | 0,00661030                           |
|                                                                           | Time effect                            | 0.0000001           | 0,00000025                           |
| Adjusted AFT model with Log[Lp(a)] (outcome MALE) with time effect        | Log[Lp(a)]                             | 0.0000014           | 0,00000315                           |
|                                                                           | Age, y                                 | 0.0000001           | 0,00000025                           |
|                                                                           | Male sex                               | 0.0030043           | 0,00521799                           |
|                                                                           | Log(Serum creatinine)                  | 0.1664505           | 0,18725681                           |
|                                                                           | History of smoking (former or current) | 0.0000001           | 0,00000025                           |
|                                                                           | Diabetes mellitus                      | 0.0000001           | 0,00000025                           |
|                                                                           | LDL cholesterol                        | 0.0000001           | 0,00000025                           |

|                                                                                       |                                                                                  |            |            |
|---------------------------------------------------------------------------------------|----------------------------------------------------------------------------------|------------|------------|
|                                                                                       | Arterial hypertension                                                            | 0.0117624  | 0,01738026 |
|                                                                                       | Dialysis                                                                         | 0.0504431  | 0,06485541 |
|                                                                                       | Time effect                                                                      | 0.0000001  | 0,00000025 |
| Adjusted AFT model with Lp(a) threshold (outcome MALE) with time effect               | High Lp(a) <sup>a</sup>                                                          | 0.0063386  | 0,01012131 |
|                                                                                       | Very High Lp(a) <sup>a</sup>                                                     | 0.0005987  | 0,00113983 |
|                                                                                       | Age, y                                                                           | 0.0000001  | 0,00000025 |
|                                                                                       | Male sex                                                                         | 0.0041064  | 0,00689040 |
|                                                                                       | Log(Serum creatinine)                                                            | 0.1313049  | 0,15811600 |
|                                                                                       | History of smoking (former or current)                                           | 0.0000001  | 0,00000025 |
|                                                                                       | Diabetes mellitus                                                                | 0.0000001  | 0,00000025 |
|                                                                                       | LDL cholesterol                                                                  | 0.0000001  | 0,00000025 |
|                                                                                       | Arterial hypertension                                                            | 0.0139361  | 0,01970963 |
|                                                                                       | Dialysis                                                                         | 0.0480577  | 0,06260148 |
|                                                                                       | Time effect                                                                      | 0.0000001  | 0,00000025 |
|                                                                                       | Adjusted AFT model with Log[Lp(a)] (outcome MALE) with hypolipemiant drug status | Log[Lp(a)] | 0.0043081  |
| Age, y                                                                                |                                                                                  | 0.0000001  | 0,00000025 |
| Male sex                                                                              |                                                                                  | 0.0117312  | 0,01738026 |
| Log(Serum creatinine)                                                                 |                                                                                  | 0.2141561  | 0,23380689 |
| History of smoking (former or current)                                                |                                                                                  | 0.0000002  | 0,00000050 |
| Diabetes mellitus                                                                     |                                                                                  | 0.0000001  | 0,00000025 |
| LDL cholesterol                                                                       |                                                                                  | 0.0000001  | 0,00000025 |
| Arterial hypertension                                                                 |                                                                                  | 0.8900296  | 0,90838073 |
| Dialysis                                                                              |                                                                                  | 0.5790493  | 0,60343032 |
| Hypolipemiant drugs                                                                   |                                                                                  | 0.0000001  | 0,00000025 |
| Adjusted AFT model with Lp(a) threshold (outcome MALE) with hypolipemiant drug status | High Lp(a) <sup>a</sup>                                                          | 0.5394637  | 0,56815858 |
|                                                                                       | Very High Lp(a) <sup>a</sup>                                                     | 0.0389911  | 0,05216377 |
|                                                                                       | Age, y                                                                           | 0.0000001  | 0,00000025 |
|                                                                                       | Male sex                                                                         | 0.0138744  | 0,01970963 |
|                                                                                       | Log(Serum creatinine)                                                            | 0.2721395  | 0,29284577 |
|                                                                                       | History of smoking (former or current)                                           | 0.0000003  | 0,00000072 |
|                                                                                       | Diabetes mellitus                                                                | 0.0000001  | 0,00000025 |
|                                                                                       | LDL cholesterol                                                                  | 0.0000001  | 0,00000025 |
|                                                                                       | Arterial hypertension                                                            | 0.9465362  | 0,94653620 |
|                                                                                       | Dialysis                                                                         | 0.6127007  | 0,63184760 |
|                                                                                       | Hypolipemiant drugs                                                              | 0.0000001  | 0,00000025 |
| Adjusted AFT model with Log[Lp(a)] (outcome MALE) with PAD status                     | Log[Lp(a)]                                                                       | 0.0192676  | 0,02686609 |
|                                                                                       | Age, y                                                                           | 0.0000044  | 0,00000947 |
|                                                                                       | Male sex                                                                         | 0.1708286  | 0,19002282 |
|                                                                                       | Log(Serum creatinine)                                                            | 0.2149134  | 0,23380689 |

|                                                                                           |                                                                          |            |            |            |
|-------------------------------------------------------------------------------------------|--------------------------------------------------------------------------|------------|------------|------------|
|                                                                                           | History of smoking (former or current)                                   | 0.0126084  | 0,01835635 |            |
|                                                                                           | Diabetes mellitus                                                        | 0.0000001  | 0,00000025 |            |
|                                                                                           | LDL cholesterol                                                          | 0.0000001  | 0,00000025 |            |
|                                                                                           | Arterial hypertension                                                    | 0.9285879  | 0,93806329 |            |
|                                                                                           | Dialysis                                                                 | 0.0721859  | 0,09162057 |            |
|                                                                                           | Peripheral arterial disease                                              | 0.0000001  | 0,00000025 |            |
| Adjusted AFT model with Log[Lp(a)] (outcome MALE) with history of ischaemic heart disease | Log[Lp(a)]                                                               | 0.0000018  | 0,00000396 |            |
|                                                                                           | Age, y                                                                   | 0.0000001  | 0,00000025 |            |
|                                                                                           | Male sex                                                                 | 0.0279242  | 0,03839578 |            |
|                                                                                           | Log(Serum creatinine)                                                    | 0.1500958  | 0,17481746 |            |
|                                                                                           | History of smoking (former or current)                                   | 0.0000001  | 0,00000025 |            |
|                                                                                           | Diabetes mellitus                                                        | 0.0000001  | 0,00000025 |            |
|                                                                                           | LDL cholesterol                                                          | 0.0000001  | 0,00000025 |            |
|                                                                                           | Arterial hypertension                                                    | 0.0014438  | 0,00269691 |            |
|                                                                                           | Dialysis                                                                 | 0.1325619  | 0,15811600 |            |
|                                                                                           | History of ischaemic heart disease                                       | 0.0000740  | 0,00014951 |            |
|                                                                                           | Adjusted AFT model with Log[Lp(a)] (outcome MALE) with history of stroke | Log[Lp(a)] | 0.0000004  | 0,00000092 |
|                                                                                           |                                                                          | Age, y     | 0.0000001  | 0,00000025 |
| Male sex                                                                                  |                                                                          | 0.0071492  | 0,01105892 |            |
| Log(Serum creatinine)                                                                     |                                                                          | 0.1531036  | 0,17624717 |            |
| History of smoking (former or current)                                                    |                                                                          | 0.0000001  | 0,00000025 |            |
| Diabetes mellitus                                                                         |                                                                          | 0.0000001  | 0,00000025 |            |
| LDL cholesterol                                                                           |                                                                          | 0.0000001  | 0,00000025 |            |
| Arterial hypertension                                                                     |                                                                          | 0.0017542  | 0,00318960 |            |
| Dialysis                                                                                  |                                                                          | 0.1223558  | 0,14954598 |            |
| History of stroke                                                                         |                                                                          | 0.3368463  | 0,35857832 |            |

\*Compared with Normal Lp(a) as reference variable

AFT: Accelerated Failure Time; CI: confidence interval LDL: low density lipoprotein; Lp(a): Lipoprotein(a); MALE: Major Adverse Limb Events; PAD : Peripheral Artery Disease

Time effect is defined as the binary variable inclusion time before or after the median inclusion time of follow up cohort, set to September 29, 2011

**eFigure 1.** Frequency Distribution of Lipoprotein(a) [Lp(a)] in All Patients

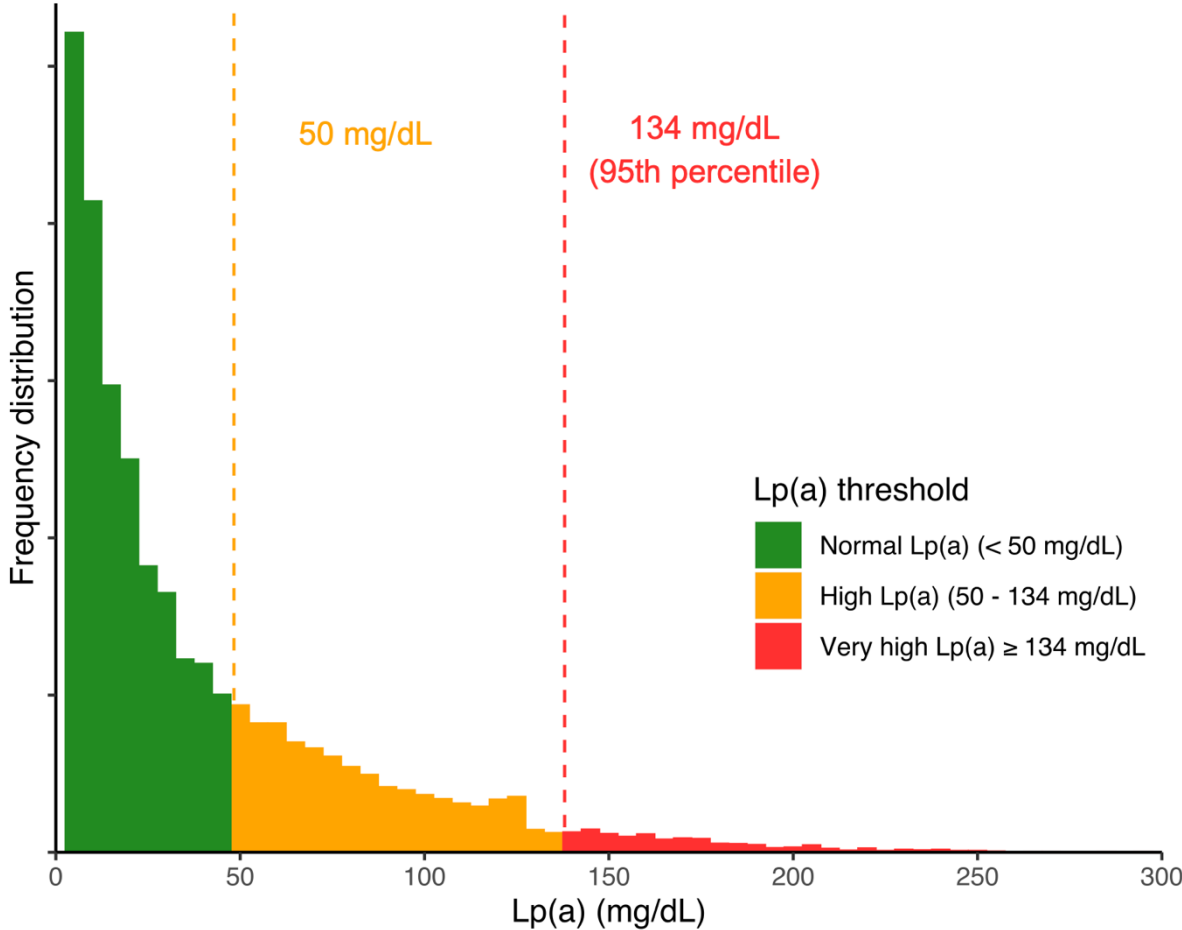

**eFigure 2.** Kaplan-Meier Survival Curves of the Cumulative Incidence of Major Amputation by Lp(a) Levels

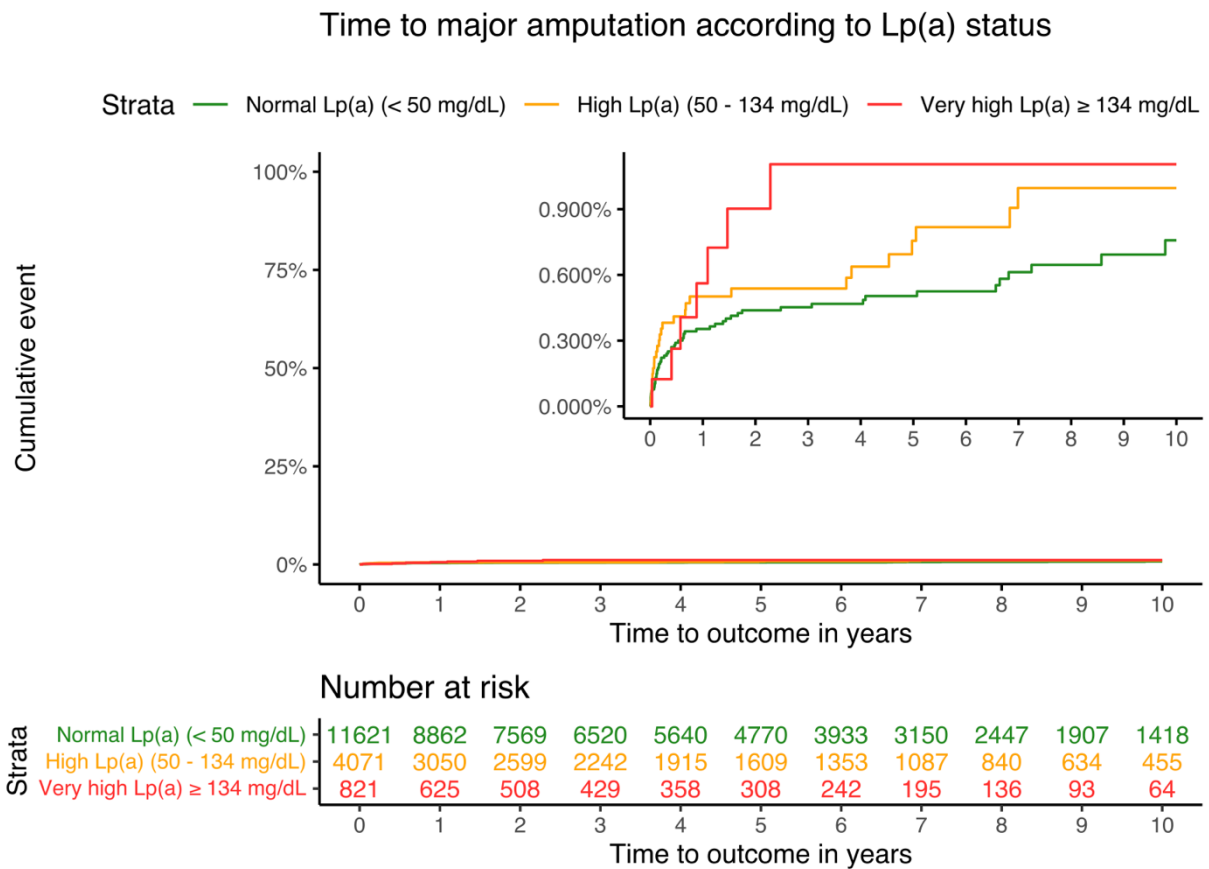

The inset shows the same data on an enlarged y axis.



**eFigure 3.** Kaplan-Meier Survival Curves of the Cumulative Incidence of Peripheral Endovascular Revascularization by Lp(a) Levels

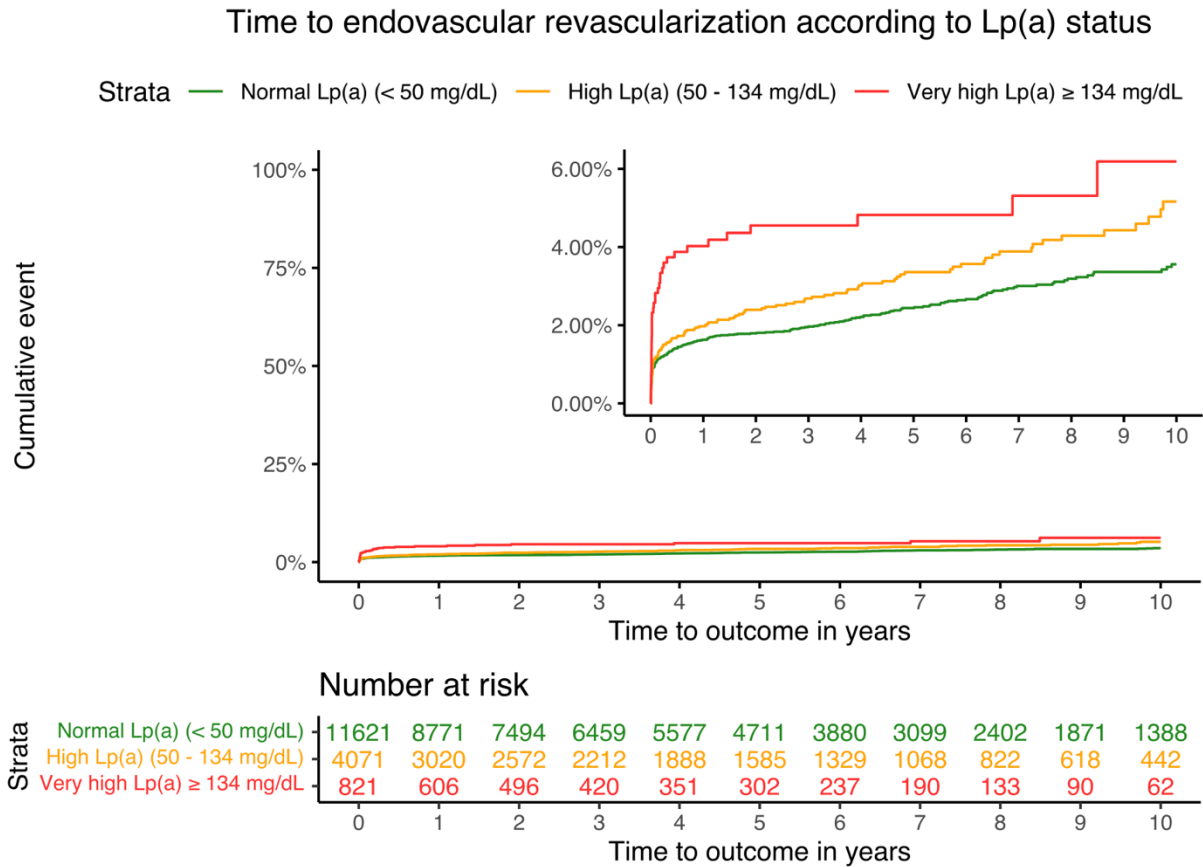

The inset shows the same data on an enlarged y axis.

**eFigure 4.** Kaplan-Meier Survival Curves of the Cumulative Incidence of Peripheral Surgical Revascularization by Lp(a) Levels

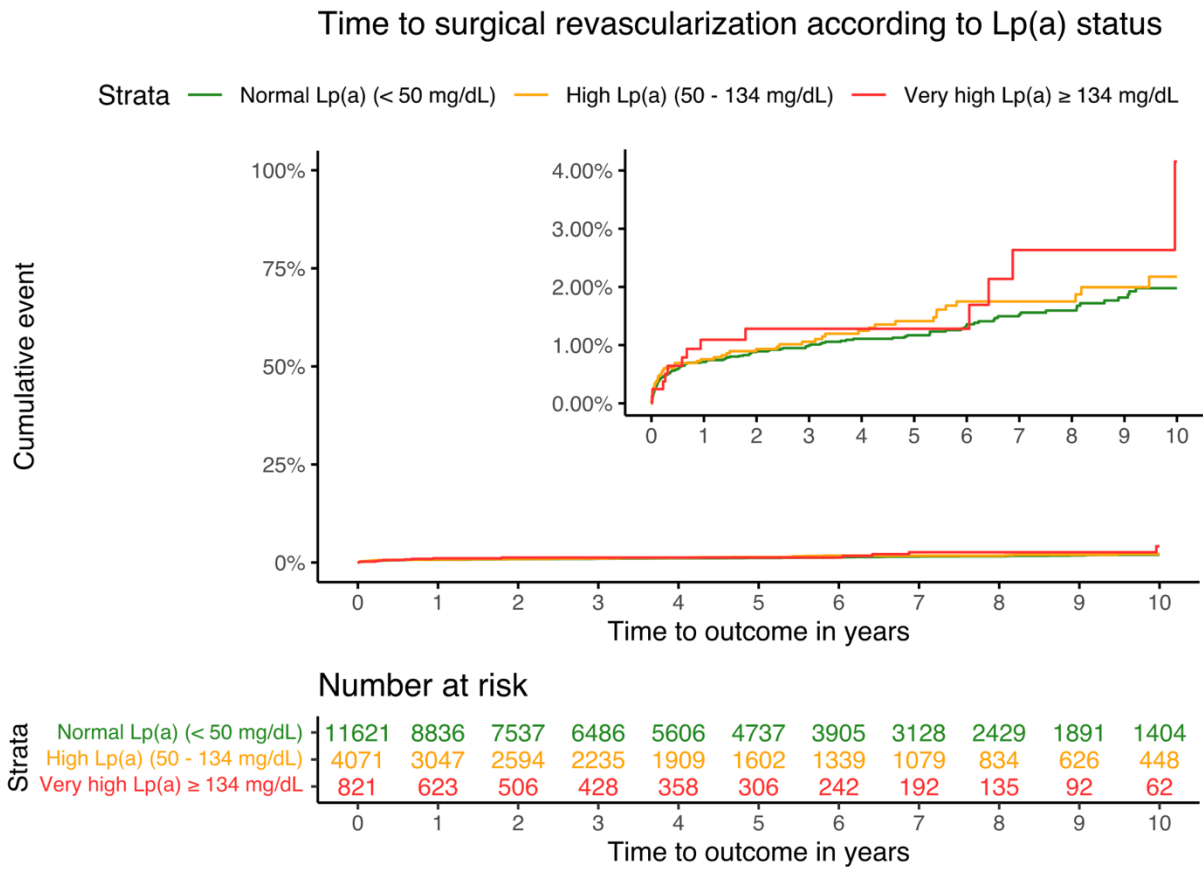

The inset shows the same data on an enlarged y axis.

**eFigure 5.** Distribution of Patients by Hospitalization Unit and Lp(a) Levels at Inclusion

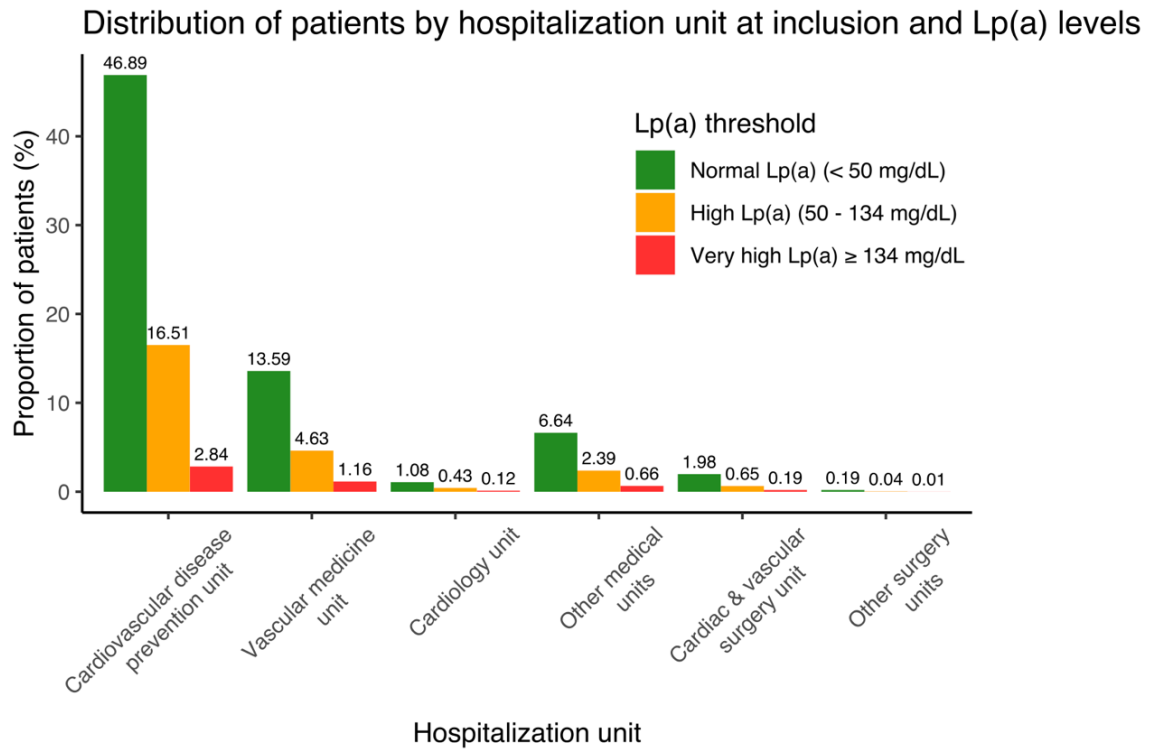

## eMethods 1. List of ICD-10 Used for Comorbidities Definitions

| Variable                          | ICD-10 code | Label                                                                                                                                       |
|-----------------------------------|-------------|---------------------------------------------------------------------------------------------------------------------------------------------|
| History of ischemic heart disease | I20         | Angina pectoris                                                                                                                             |
| History of ischemic heart disease | I200        | Unstable angina                                                                                                                             |
| History of ischemic heart disease | I201        | Angina pectoris with documented spasm                                                                                                       |
| History of ischemic heart disease | I208        | Other forms of angina pectoris                                                                                                              |
| History of ischemic heart disease | I209        | Angina pectoris, unspecified                                                                                                                |
| History of ischemic heart disease | I21         | ST elevation (STEMI) and non-ST elevation (NSTEMI) myocardial infarction                                                                    |
| History of ischemic heart disease | I210        | ST elevation (STEMI) myocardial infarction of anterior wall                                                                                 |
| History of ischemic heart disease | I2101       | ST elevation (STEMI) myocardial infarction involving left main coronary artery                                                              |
| History of ischemic heart disease | I2102       | ST elevation (STEMI) myocardial infarction involving left anterior descending coronary artery                                               |
| History of ischemic heart disease | I2109       | ST elevation (STEMI) myocardial infarction involving other coronary artery of anterior wall                                                 |
| History of ischemic heart disease | I211        | ST elevation (STEMI) myocardial infarction of inferior wall                                                                                 |
| History of ischemic heart disease | I2111       | ST elevation (STEMI) myocardial infarction involving right coronary artery                                                                  |
| History of ischemic heart disease | I2119       | ST elevation (STEMI) myocardial infarction involving other coronary artery of inferior wall                                                 |
| History of ischemic heart disease | I212        | ST elevation (STEMI) myocardial infarction of other sites                                                                                   |
| History of ischemic heart disease | I2121       | ST elevation (STEMI) myocardial infarction involving left circumflex coronary artery                                                        |
| History of ischemic heart disease | I2129       | ST elevation (STEMI) myocardial infarction involving other sites                                                                            |
| History of ischemic heart disease | I213        | ST elevation (STEMI) myocardial infarction of unspecified site                                                                              |
| History of ischemic heart disease | I214        | Non-ST elevation (NSTEMI) myocardial infarction                                                                                             |
| History of ischemic heart disease | I22         | Subsequent ST elevation (STEMI) and non-ST elevation (NSTEMI) myocardial infarction                                                         |
| History of ischemic heart disease | I220        | Subsequent ST elevation (STEMI) myocardial infarction of anterior wall                                                                      |
| History of ischemic heart disease | I221        | Subsequent ST elevation (STEMI) myocardial infarction of inferior wall                                                                      |
| History of ischemic heart disease | I222        | Subsequent non-ST elevation (NSTEMI) myocardial infarction                                                                                  |
| History of ischemic heart disease | I228        | Subsequent ST elevation (STEMI) myocardial infarction of other sites                                                                        |
| History of ischemic heart disease | I229        | Subsequent ST elevation (STEMI) myocardial infarction of unspecified site                                                                   |
| History of ischemic heart disease | I23         | Certain current complications following ST elevation (STEMI) and non-ST elevation (NSTEMI) myocardial infarction (within the 28 day period) |
| History of ischemic heart disease | I230        | Hemopericardium as current complication following acute myocardial infarction                                                               |
| History of ischemic heart disease | I231        | Atrial septal defect as current complication following acute myocardial infarction                                                          |
| History of ischemic heart disease | I232        | Ventricular septal defect as current complication following acute myocardial infarction                                                     |
| History of ischemic heart disease | I233        | Rupture of cardiac wall without hemopericardium as current complication following acute myocardial infarction                               |
| History of ischemic heart disease | I234        | Rupture of chordae tendineae as current complication following acute myocardial infarction                                                  |

|                                   |        |                                                                                                                         |
|-----------------------------------|--------|-------------------------------------------------------------------------------------------------------------------------|
| History of ischemic heart disease | I235   | Rupture of papillary muscle as current complication following acute myocardial infarction                               |
| History of ischemic heart disease | I236   | Thrombosis of atrium, auricular appendage, and ventricle as current complications following acute myocardial infarction |
| History of ischemic heart disease | I237   | Postinfarction angina                                                                                                   |
| History of ischemic heart disease | I238   | Other current complications following acute myocardial infarction                                                       |
| History of ischemic heart disease | I24    | Other acute ischemic heart diseases                                                                                     |
| History of ischemic heart disease | I240   | Acute coronary thrombosis not resulting in myocardial infarction                                                        |
| History of ischemic heart disease | I241   | Dressler's syndrome                                                                                                     |
| History of ischemic heart disease | I248   | Other forms of acute ischemic heart disease                                                                             |
| History of ischemic heart disease | I249   | Acute ischemic heart disease, unspecified                                                                               |
| History of ischemic heart disease | I25    | Chronic ischemic heart disease                                                                                          |
| History of ischemic heart disease | I251   | Atherosclerotic heart disease of native coronary artery                                                                 |
| History of ischemic heart disease | I2510  | Atherosclerotic heart disease of native coronary artery without angina pectoris                                         |
| History of ischemic heart disease | I2511  | Atherosclerotic heart disease of native coronary artery with angina pectoris                                            |
| History of ischemic heart disease | I25110 | Atherosclerotic heart disease of native coronary artery with unstable angina pectoris                                   |
| History of ischemic heart disease | I25111 | Atherosclerotic heart disease of native coronary artery with angina pectoris with documented spasm                      |
| History of ischemic heart disease | I25118 | Atherosclerotic heart disease of native coronary artery with other forms of angina pectoris                             |
| History of ischemic heart disease | I25119 | Atherosclerotic heart disease of native coronary artery with unspecified angina pectoris                                |
| History of ischemic heart disease | I252   | Old myocardial infarction                                                                                               |
| History of ischemic heart disease | I253   | Aneurysm of heart                                                                                                       |
| History of ischemic heart disease | I254   | Coronary artery aneurysm and dissection                                                                                 |
| History of ischemic heart disease | I2541  | Coronary artery aneurysm                                                                                                |
| History of ischemic heart disease | I2542  | Coronary artery dissection                                                                                              |
| History of ischemic heart disease | I255   | Ischemic cardiomyopathy                                                                                                 |
| History of ischemic heart disease | I256   | Silent myocardial ischemia                                                                                              |
| History of ischemic heart disease | I257   | Atherosclerosis of coronary artery bypass graft(s) and coronary artery of transplanted heart with angina pectoris       |
| History of ischemic heart disease | I2570  | Atherosclerosis of coronary artery bypass graft(s), unspecified, with angina pectoris                                   |
| History of ischemic heart disease | I25700 | Atherosclerosis of coronary artery bypass graft(s), unspecified, with unstable angina pectoris                          |
| History of ischemic heart disease | I25701 | Atherosclerosis of coronary artery bypass graft(s), unspecified, with angina pectoris with documented spasm             |
| History of ischemic heart disease | I25708 | Atherosclerosis of coronary artery bypass graft(s), unspecified, with other forms of angina pectoris                    |
| History of ischemic heart disease | I25709 | Atherosclerosis of coronary artery bypass graft(s), unspecified, with unspecified angina pectoris                       |
| History of ischemic heart disease | I2571  | Atherosclerosis of autologous vein coronary artery bypass graft(s) with angina pectoris                                 |
| History of ischemic heart disease | I25710 | Atherosclerosis of autologous vein coronary artery bypass graft(s) with unstable angina pectoris                        |

|                                   |        |                                                                                                                        |
|-----------------------------------|--------|------------------------------------------------------------------------------------------------------------------------|
| History of ischemic heart disease | I25711 | Atherosclerosis of autologous vein coronary artery bypass graft(s) with angina pectoris with documented spasm          |
| History of ischemic heart disease | I25718 | Atherosclerosis of autologous vein coronary artery bypass graft(s) with other forms of angina pectoris                 |
| History of ischemic heart disease | I25719 | Atherosclerosis of autologous vein coronary artery bypass graft(s) with unspecified angina pectoris                    |
| History of ischemic heart disease | I2572  | Atherosclerosis of autologous artery coronary artery bypass graft(s) with angina pectoris                              |
| History of ischemic heart disease | I25720 | Atherosclerosis of autologous artery coronary artery bypass graft(s) with unstable angina pectoris                     |
| History of ischemic heart disease | I25721 | Atherosclerosis of autologous artery coronary artery bypass graft(s) with angina pectoris with documented spasm        |
| History of ischemic heart disease | I25728 | Atherosclerosis of autologous artery coronary artery bypass graft(s) with other forms of angina pectoris               |
| History of ischemic heart disease | I25729 | Atherosclerosis of autologous artery coronary artery bypass graft(s) with unspecified angina pectoris                  |
| History of ischemic heart disease | I2573  | Atherosclerosis of nonautologous biological coronary artery bypass graft(s) with angina pectoris                       |
| History of ischemic heart disease | I25730 | Atherosclerosis of nonautologous biological coronary artery bypass graft(s) with unstable angina pectoris              |
| History of ischemic heart disease | I25731 | Atherosclerosis of nonautologous biological coronary artery bypass graft(s) with angina pectoris with documented spasm |
| History of ischemic heart disease | I25738 | Atherosclerosis of nonautologous biological coronary artery bypass graft(s) with other forms of angina pectoris        |
| History of ischemic heart disease | I25739 | Atherosclerosis of nonautologous biological coronary artery bypass graft(s) with unspecified angina pectoris           |
| History of ischemic heart disease | I2575  | Atherosclerosis of native coronary artery of transplanted heart with angina pectoris                                   |
| History of ischemic heart disease | I25750 | Atherosclerosis of native coronary artery of transplanted heart with unstable angina                                   |
| History of ischemic heart disease | I25751 | Atherosclerosis of native coronary artery of transplanted heart with angina pectoris with documented spasm             |
| History of ischemic heart disease | I25758 | Atherosclerosis of native coronary artery of transplanted heart with other forms of angina pectoris                    |
| History of ischemic heart disease | I25759 | Atherosclerosis of native coronary artery of transplanted heart with unspecified angina pectoris                       |
| History of ischemic heart disease | I2576  | Atherosclerosis of bypass graft of coronary artery of transplanted heart with angina pectoris                          |
| History of ischemic heart disease | I25760 | Atherosclerosis of bypass graft of coronary artery of transplanted heart with unstable angina                          |
| History of ischemic heart disease | I25761 | Atherosclerosis of bypass graft of coronary artery of transplanted heart with angina pectoris with documented spasm    |
| History of ischemic heart disease | I25768 | Atherosclerosis of bypass graft of coronary artery of transplanted heart with other forms of angina pectoris           |
| History of ischemic heart disease | I25769 | Atherosclerosis of bypass graft of coronary artery of transplanted heart with unspecified angina pectoris              |
| History of ischemic heart disease | I2579  | Atherosclerosis of other coronary artery bypass graft(s) with angina pectoris                                          |
| History of ischemic heart disease | I25790 | Atherosclerosis of other coronary artery bypass graft(s) with unstable angina pectoris                                 |
| History of ischemic heart disease | I25791 | Atherosclerosis of other coronary artery bypass graft(s) with angina pectoris with documented spasm                    |
| History of ischemic heart disease | I25798 | Atherosclerosis of other coronary artery bypass graft(s) with other forms of angina pectoris                           |
| History of ischemic heart disease | I25799 | Atherosclerosis of other coronary artery bypass graft(s) with unspecified angina pectoris                              |
| History of ischemic heart disease | I258   | Other forms of chronic ischemic heart disease                                                                          |
| History of ischemic heart disease | I2581  | Atherosclerosis of other coronary vessels without angina pectoris                                                      |
| History of ischemic heart disease | I25810 | Atherosclerosis of coronary artery bypass graft(s) without angina pectoris                                             |
| History of ischemic heart disease | I25811 | Atherosclerosis of native coronary artery of transplanted heart without angina pectoris                                |

|                                   |        |                                                                                                  |
|-----------------------------------|--------|--------------------------------------------------------------------------------------------------|
| History of ischemic heart disease | I25812 | Atherosclerosis of bypass graft of coronary artery of transplanted heart without angina pectoris |
| History of ischemic heart disease | I2582  | Chronic total occlusion of coronary artery                                                       |
| History of ischemic heart disease | I2583  | Coronary atherosclerosis due to lipid rich plaque                                                |
| History of ischemic heart disease | I2584  | Coronary atherosclerosis due to calcified coronary lesion                                        |
| History of ischemic heart disease | I2589  | Other forms of chronic ischemic heart disease                                                    |
| History of ischemic heart disease | I259   | Chronic ischemic heart disease, unspecified                                                      |
| Peripheral artery disease         | I702   | Atherosclerosis of native arteries of the extremities                                            |
| Peripheral artery disease         | I7020  | Unspecified atherosclerosis of native arteries of extremities                                    |
| Peripheral artery disease         | I7021  | Atherosclerosis of native arteries of extremities with intermittent claudication                 |
| Peripheral artery disease         | I743   | Embolism and thrombosis of arteries of the lower extremities                                     |
| History of stroke                 | I60    | Nontraumatic subarachnoid hemorrhage                                                             |
| History of stroke                 | I600   | Nontraumatic subarachnoid hemorrhage from carotid siphon and bifurcation                         |
| History of stroke                 | I6000  | Nontraumatic subarachnoid hemorrhage from unspecified carotid siphon and bifurcation             |
| History of stroke                 | I6001  | Nontraumatic subarachnoid hemorrhage from right carotid siphon and bifurcation                   |
| History of stroke                 | I6002  | Nontraumatic subarachnoid hemorrhage from left carotid siphon and bifurcation                    |
| History of stroke                 | I601   | Nontraumatic subarachnoid hemorrhage from middle cerebral artery                                 |
| History of stroke                 | I6010  | Nontraumatic subarachnoid hemorrhage from unspecified middle cerebral artery                     |
| History of stroke                 | I6011  | Nontraumatic subarachnoid hemorrhage from right middle cerebral artery                           |
| History of stroke                 | I6012  | Nontraumatic subarachnoid hemorrhage from left middle cerebral artery                            |
| History of stroke                 | I602   | Nontraumatic subarachnoid hemorrhage from anterior communicating artery                          |
| History of stroke                 | I6020  | Nontraumatic subarachnoid hemorrhage from unspecified anterior communicating artery              |
| History of stroke                 | I6021  | Nontraumatic subarachnoid hemorrhage from right anterior communicating artery                    |
| History of stroke                 | I6022  | Nontraumatic subarachnoid hemorrhage from left anterior communicating artery                     |
| History of stroke                 | I603   | Nontraumatic subarachnoid hemorrhage from posterior communicating artery                         |
| History of stroke                 | I6030  | Nontraumatic subarachnoid hemorrhage from unspecified posterior communicating artery             |
| History of stroke                 | I6031  | Nontraumatic subarachnoid hemorrhage from right posterior communicating artery                   |
| History of stroke                 | I6032  | Nontraumatic subarachnoid hemorrhage from left posterior communicating artery                    |
| History of stroke                 | I604   | Nontraumatic subarachnoid hemorrhage from basilar artery                                         |
| History of stroke                 | I605   | Nontraumatic subarachnoid hemorrhage from vertebral artery                                       |
| History of stroke                 | I6050  | Nontraumatic subarachnoid hemorrhage from unspecified vertebral artery                           |
| History of stroke                 | I6051  | Nontraumatic subarachnoid hemorrhage from right vertebral artery                                 |
| History of stroke                 | I6052  | Nontraumatic subarachnoid hemorrhage from left vertebral artery                                  |
| History of stroke                 | I606   | Nontraumatic subarachnoid hemorrhage from other intracranial arteries                            |
| History of stroke                 | I607   | Nontraumatic subarachnoid hemorrhage from unspecified intracranial artery                        |
| History of stroke                 | I608   | Other nontraumatic subarachnoid hemorrhage                                                       |
| History of stroke                 | I609   | Nontraumatic subarachnoid hemorrhage, unspecified                                                |
| History of stroke                 | I61    | Nontraumatic intracerebral hemorrhage                                                            |
| History of stroke                 | I610   | Nontraumatic intracerebral hemorrhage in hemisphere, subcortical                                 |
| History of stroke                 | I611   | Nontraumatic intracerebral hemorrhage in hemisphere, cortical                                    |
| History of stroke                 | I612   | Nontraumatic intracerebral hemorrhage in hemisphere, unspecified                                 |
| History of stroke                 | I613   | Nontraumatic intracerebral hemorrhage in brain stem                                              |
| History of stroke                 | I614   | Nontraumatic intracerebral hemorrhage in cerebellum                                              |
| History of stroke                 | I615   | Nontraumatic intracerebral hemorrhage, intraventricular                                          |

|                   |        |                                                                                                  |
|-------------------|--------|--------------------------------------------------------------------------------------------------|
| History of stroke | I616   | Nontraumatic intracerebral hemorrhage, multiple localized                                        |
| History of stroke | I618   | Other nontraumatic intracerebral hemorrhage                                                      |
| History of stroke | I619   | Nontraumatic intracerebral hemorrhage, unspecified                                               |
| History of stroke | I62    | Other and unspecified nontraumatic intracranial hemorrhage                                       |
| History of stroke | I620   | Nontraumatic subdural hemorrhage                                                                 |
| History of stroke | I6200  | Nontraumatic subdural hemorrhage, unspecified                                                    |
| History of stroke | I6201  | Nontraumatic acute subdural hemorrhage                                                           |
| History of stroke | I6202  | Nontraumatic subacute subdural hemorrhage                                                        |
| History of stroke | I6203  | Nontraumatic chronic subdural hemorrhage                                                         |
| History of stroke | I621   | Nontraumatic extradural hemorrhage                                                               |
| History of stroke | I629   | Nontraumatic intracranial hemorrhage, unspecified                                                |
| History of stroke | I63    | Cerebral infarction                                                                              |
| History of stroke | I630   | Cerebral infarction due to thrombosis of precerebral arteries                                    |
| History of stroke | I6300  | Cerebral infarction due to thrombosis of unspecified precerebral artery                          |
| History of stroke | I6301  | Cerebral infarction due to thrombosis of vertebral artery                                        |
| History of stroke | I63011 | Cerebral infarction due to thrombosis of right vertebral artery                                  |
| History of stroke | I63012 | Cerebral infarction due to thrombosis of left vertebral artery                                   |
| History of stroke | I63019 | Cerebral infarction due to thrombosis of unspecified vertebral artery                            |
| History of stroke | I6302  | Cerebral infarction due to thrombosis of basilar artery                                          |
| History of stroke | I6303  | Cerebral infarction due to thrombosis of carotid artery                                          |
| History of stroke | I63031 | Cerebral infarction due to thrombosis of right carotid artery                                    |
| History of stroke | I63032 | Cerebral infarction due to thrombosis of left carotid artery                                     |
| History of stroke | I63039 | Cerebral infarction due to thrombosis of unspecified carotid artery                              |
| History of stroke | I6309  | Cerebral infarction due to thrombosis of other precerebral artery                                |
| History of stroke | I631   | Cerebral infarction due to embolism of precerebral arteries                                      |
| History of stroke | I6310  | Cerebral infarction due to embolism of unspecified precerebral artery                            |
| History of stroke | I6311  | Cerebral infarction due to embolism of vertebral artery                                          |
| History of stroke | I63111 | Cerebral infarction due to embolism of right vertebral artery                                    |
| History of stroke | I63112 | Cerebral infarction due to embolism of left vertebral artery                                     |
| History of stroke | I63119 | Cerebral infarction due to embolism of unspecified vertebral artery                              |
| History of stroke | I6312  | Cerebral infarction due to embolism of basilar artery                                            |
| History of stroke | I6313  | Cerebral infarction due to embolism of carotid artery                                            |
| History of stroke | I63131 | Cerebral infarction due to embolism of right carotid artery                                      |
| History of stroke | I63132 | Cerebral infarction due to embolism of left carotid artery                                       |
| History of stroke | I63139 | Cerebral infarction due to embolism of unspecified carotid artery                                |
| History of stroke | I6319  | Cerebral infarction due to embolism of other precerebral artery                                  |
| History of stroke | I632   | Cerebral infarction due to unspecified occlusion or stenosis of precerebral arteries             |
| History of stroke | I6320  | Cerebral infarction due to unspecified occlusion or stenosis of unspecified precerebral arteries |
| History of stroke | I6321  | Cerebral infarction due to unspecified occlusion or stenosis of vertebral arteries               |
| History of stroke | I63211 | Cerebral infarction due to unspecified occlusion or stenosis of right vertebral arteries         |
| History of stroke | I63212 | Cerebral infarction due to unspecified occlusion or stenosis of left vertebral arteries          |
| History of stroke | I63219 | Cerebral infarction due to unspecified occlusion or stenosis of unspecified vertebral arteries   |
| History of stroke | I6322  | Cerebral infarction due to unspecified occlusion or stenosis of basilar arteries                 |
| History of stroke | I6323  | Cerebral infarction due to unspecified occlusion or stenosis of carotid arteries                 |
| History of stroke | I63231 | Cerebral infarction due to unspecified occlusion or stenosis of right carotid arteries           |
| History of stroke | I63232 | Cerebral infarction due to unspecified occlusion or stenosis of left carotid arteries            |
| History of stroke | I63239 | Cerebral infarction due to unspecified occlusion or stenosis of unspecified carotid arteries     |
| History of stroke | I6329  | Cerebral infarction due to unspecified occlusion or stenosis of other precerebral arteries       |



|                   |        |                                                                                                    |
|-------------------|--------|----------------------------------------------------------------------------------------------------|
| History of stroke | I633   | Cerebral infarction due to thrombosis of cerebral arteries                                         |
| History of stroke | I6330  | Cerebral infarction due to thrombosis of unspecified cerebral artery                               |
| History of stroke | I6331  | Cerebral infarction due to thrombosis of middle cerebral artery                                    |
| History of stroke | I63311 | Cerebral infarction due to thrombosis of right middle cerebral artery                              |
| History of stroke | I63312 | Cerebral infarction due to thrombosis of left middle cerebral artery                               |
| History of stroke | I63319 | Cerebral infarction due to thrombosis of unspecified middle cerebral artery                        |
| History of stroke | I6332  | Cerebral infarction due to thrombosis of anterior cerebral artery                                  |
| History of stroke | I63321 | Cerebral infarction due to thrombosis of right anterior cerebral artery                            |
| History of stroke | I63322 | Cerebral infarction due to thrombosis of left anterior cerebral artery                             |
| History of stroke | I63329 | Cerebral infarction due to thrombosis of unspecified anterior cerebral artery                      |
| History of stroke | I6333  | Cerebral infarction due to thrombosis of posterior cerebral artery                                 |
| History of stroke | I63331 | Cerebral infarction due to thrombosis of right posterior cerebral artery                           |
| History of stroke | I63332 | Cerebral infarction due to thrombosis of left posterior cerebral artery                            |
| History of stroke | I63339 | Cerebral infarction due to thrombosis of unspecified posterior cerebral artery                     |
| History of stroke | I6334  | Cerebral infarction due to thrombosis of cerebellar artery                                         |
| History of stroke | I63341 | Cerebral infarction due to thrombosis of right cerebellar artery                                   |
| History of stroke | I63342 | Cerebral infarction due to thrombosis of left cerebellar artery                                    |
| History of stroke | I63349 | Cerebral infarction due to thrombosis of unspecified cerebellar artery                             |
| History of stroke | I6339  | Cerebral infarction due to thrombosis of other cerebral artery                                     |
| History of stroke | I634   | Cerebral infarction due to embolism of cerebral arteries                                           |
| History of stroke | I6340  | Cerebral infarction due to embolism of unspecified cerebral artery                                 |
| History of stroke | I6341  | Cerebral infarction due to embolism of middle cerebral artery                                      |
| History of stroke | I63411 | Cerebral infarction due to embolism of right middle cerebral artery                                |
| History of stroke | I63412 | Cerebral infarction due to embolism of left middle cerebral artery                                 |
| History of stroke | I63419 | Cerebral infarction due to embolism of unspecified middle cerebral artery                          |
| History of stroke | I6342  | Cerebral infarction due to embolism of anterior cerebral artery                                    |
| History of stroke | I63421 | Cerebral infarction due to embolism of right anterior cerebral artery                              |
| History of stroke | I63422 | Cerebral infarction due to embolism of left anterior cerebral artery                               |
| History of stroke | I63429 | Cerebral infarction due to embolism of unspecified anterior cerebral artery                        |
| History of stroke | I6343  | Cerebral infarction due to embolism of posterior cerebral artery                                   |
| History of stroke | I63431 | Cerebral infarction due to embolism of right posterior cerebral artery                             |
| History of stroke | I63432 | Cerebral infarction due to embolism of left posterior cerebral artery                              |
| History of stroke | I63439 | Cerebral infarction due to embolism of unspecified posterior cerebral artery                       |
| History of stroke | I6344  | Cerebral infarction due to embolism of cerebellar artery                                           |
| History of stroke | I63441 | Cerebral infarction due to embolism of right cerebellar artery                                     |
| History of stroke | I63442 | Cerebral infarction due to embolism of left cerebellar artery                                      |
| History of stroke | I63449 | Cerebral infarction due to embolism of unspecified cerebellar artery                               |
| History of stroke | I6349  | Cerebral infarction due to embolism of other cerebral artery                                       |
| History of stroke | I635   | Cerebral infarction due to unspecified occlusion or stenosis of cerebral arteries                  |
| History of stroke | I6350  | Cerebral infarction due to unspecified occlusion or stenosis of unspecified cerebral artery        |
| History of stroke | I6351  | Cerebral infarction due to unspecified occlusion or stenosis of middle cerebral artery             |
| History of stroke | I63511 | Cerebral infarction due to unspecified occlusion or stenosis of right middle cerebral artery       |
| History of stroke | I63512 | Cerebral infarction due to unspecified occlusion or stenosis of left middle cerebral artery        |
| History of stroke | I63519 | Cerebral infarction due to unspecified occlusion or stenosis of unspecified middle cerebral artery |
| History of stroke | I6352  | Cerebral infarction due to unspecified occlusion or stenosis of anterior cerebral artery           |
| History of stroke | I63521 | Cerebral infarction due to unspecified occlusion or stenosis of right anterior cerebral artery     |
| History of stroke | I63522 | Cerebral infarction due to unspecified occlusion or stenosis of left anterior cerebral artery      |

|                   |        |                                                                                                             |
|-------------------|--------|-------------------------------------------------------------------------------------------------------------|
| History of stroke | I63529 | Cerebral infarction due to unspecified occlusion or stenosis of unspecified anterior cerebral artery        |
| History of stroke | I6353  | Cerebral infarction due to unspecified occlusion or stenosis of posterior cerebral artery                   |
| History of stroke | I63531 | Cerebral infarction due to unspecified occlusion or stenosis of right posterior cerebral artery             |
| History of stroke | I63532 | Cerebral infarction due to unspecified occlusion or stenosis of left posterior cerebral artery              |
| History of stroke | I63539 | Cerebral infarction due to unspecified occlusion or stenosis of unspecified posterior cerebral artery       |
| History of stroke | I6354  | Cerebral infarction due to unspecified occlusion or stenosis of cerebellar artery                           |
| History of stroke | I63541 | Cerebral infarction due to unspecified occlusion or stenosis of right cerebellar artery                     |
| History of stroke | I63542 | Cerebral infarction due to unspecified occlusion or stenosis of left cerebellar artery                      |
| History of stroke | I63549 | Cerebral infarction due to unspecified occlusion or stenosis of unspecified cerebellar artery               |
| History of stroke | I6359  | Cerebral infarction due to unspecified occlusion or stenosis of other cerebral artery                       |
| History of stroke | I636   | Cerebral infarction due to cerebral venous thrombosis, nonpyogenic                                          |
| History of stroke | I638   | Other cerebral infarction                                                                                   |
| History of stroke | I639   | Cerebral infarction, unspecified                                                                            |
| History of stroke | I69    | Sequelae of cerebrovascular disease                                                                         |
| History of stroke | I690   | Sequelae of nontraumatic subarachnoid hemorrhage                                                            |
| History of stroke | I6900  | Unspecified sequelae of nontraumatic subarachnoid hemorrhage                                                |
| History of stroke | I6901  | Cognitive deficits following nontraumatic subarachnoid hemorrhage                                           |
| History of stroke | I6902  | Speech and language deficits following nontraumatic subarachnoid hemorrhage                                 |
| History of stroke | I69020 | Aphasia following nontraumatic subarachnoid hemorrhage                                                      |
| History of stroke | I69021 | Dysphasia following nontraumatic subarachnoid hemorrhage                                                    |
| History of stroke | I69022 | Dysarthria following nontraumatic subarachnoid hemorrhage                                                   |
| History of stroke | I69023 | Fluency disorder following nontraumatic subarachnoid hemorrhage                                             |
| History of stroke | I69028 | Other speech and language deficits following nontraumatic subarachnoid hemorrhage                           |
| History of stroke | I6903  | Monoplegia of upper limb following nontraumatic subarachnoid hemorrhage                                     |
| History of stroke | I69031 | Monoplegia of upper limb following nontraumatic subarachnoid hemorrhage affecting right dominant side       |
| History of stroke | I69032 | Monoplegia of upper limb following nontraumatic subarachnoid hemorrhage affecting left dominant side        |
| History of stroke | I69033 | Monoplegia of upper limb following nontraumatic subarachnoid hemorrhage affecting right non-dominant side   |
| History of stroke | I69034 | Monoplegia of upper limb following nontraumatic subarachnoid hemorrhage affecting left non-dominant side    |
| History of stroke | I69039 | Monoplegia of upper limb following nontraumatic subarachnoid hemorrhage affecting unspecified side          |
| History of stroke | I6904  | Monoplegia of lower limb following nontraumatic subarachnoid hemorrhage                                     |
| History of stroke | I69041 | Monoplegia of lower limb following nontraumatic subarachnoid hemorrhage affecting right dominant side       |
| History of stroke | I69042 | Monoplegia of lower limb following nontraumatic subarachnoid hemorrhage affecting left dominant side        |
| History of stroke | I69043 | Monoplegia of lower limb following nontraumatic subarachnoid hemorrhage affecting right non-dominant side   |
| History of stroke | I69044 | Monoplegia of lower limb following nontraumatic subarachnoid hemorrhage affecting left non-dominant side    |
| History of stroke | I69049 | Monoplegia of lower limb following nontraumatic subarachnoid hemorrhage affecting unspecified side          |
| History of stroke | I6905  | Hemiplegia and hemiparesis following nontraumatic subarachnoid hemorrhage                                   |
| History of stroke | I69051 | Hemiplegia and hemiparesis following nontraumatic subarachnoid hemorrhage affecting right dominant side     |
| History of stroke | I69052 | Hemiplegia and hemiparesis following nontraumatic subarachnoid hemorrhage affecting left dominant side      |
| History of stroke | I69053 | Hemiplegia and hemiparesis following nontraumatic subarachnoid hemorrhage affecting right non-dominant side |

|                   |        |                                                                                                            |
|-------------------|--------|------------------------------------------------------------------------------------------------------------|
| History of stroke | I69054 | Hemiplegia and hemiparesis following nontraumatic subarachnoid hemorrhage affecting left non-dominant side |
| History of stroke | I69059 | Hemiplegia and hemiparesis following nontraumatic subarachnoid hemorrhage affecting unspecified side       |
| History of stroke | I6906  | Other paralytic syndrome following nontraumatic subarachnoid hemorrhage                                    |
| History of stroke | I69061 | Other paralytic syndrome following nontraumatic subarachnoid hemorrhage affecting right dominant side      |
| History of stroke | I69062 | Other paralytic syndrome following nontraumatic subarachnoid hemorrhage affecting left dominant side       |
| History of stroke | I69063 | Other paralytic syndrome following nontraumatic subarachnoid hemorrhage affecting right non-dominant side  |
| History of stroke | I69064 | Other paralytic syndrome following nontraumatic subarachnoid hemorrhage affecting left non-dominant side   |
| History of stroke | I69065 | Other paralytic syndrome following nontraumatic subarachnoid hemorrhage, bilateral                         |
| History of stroke | I69069 | Other paralytic syndrome following nontraumatic subarachnoid hemorrhage affecting unspecified side         |
| History of stroke | I6909  | Other sequelae of nontraumatic subarachnoid hemorrhage                                                     |
| History of stroke | I69090 | Apraxia following nontraumatic subarachnoid hemorrhage                                                     |
| History of stroke | I69091 | Dysphagia following nontraumatic subarachnoid hemorrhage                                                   |
| History of stroke | I69092 | Facial weakness following nontraumatic subarachnoid hemorrhage                                             |
| History of stroke | I69093 | Ataxia following nontraumatic subarachnoid hemorrhage                                                      |
| History of stroke | I69098 | Other sequelae following nontraumatic subarachnoid hemorrhage                                              |
| History of stroke | I691   | Sequelae of nontraumatic intracerebral hemorrhage                                                          |
| History of stroke | I6910  | Unspecified sequelae of nontraumatic intracerebral hemorrhage                                              |
| History of stroke | I6911  | Cognitive deficits following nontraumatic intracerebral hemorrhage                                         |
| History of stroke | I6912  | Speech and language deficits following nontraumatic intracerebral hemorrhage                               |
| History of stroke | I69120 | Aphasia following nontraumatic intracerebral hemorrhage                                                    |
| History of stroke | I69121 | Dysphasia following nontraumatic intracerebral hemorrhage                                                  |
| History of stroke | I69122 | Dysarthria following nontraumatic intracerebral hemorrhage                                                 |
| History of stroke | I69123 | Fluency disorder following nontraumatic intracerebral hemorrhage                                           |
| History of stroke | I69128 | Other speech and language deficits following nontraumatic intracerebral hemorrhage                         |
| History of stroke | I6913  | Monoplegia of upper limb following nontraumatic intracerebral hemorrhage                                   |
| History of stroke | I69131 | Monoplegia of upper limb following nontraumatic intracerebral hemorrhage affecting right dominant side     |
| History of stroke | I69132 | Monoplegia of upper limb following nontraumatic intracerebral hemorrhage affecting left dominant side      |
| History of stroke | I69133 | Monoplegia of upper limb following nontraumatic intracerebral hemorrhage affecting right non-dominant side |
| History of stroke | I69134 | Monoplegia of upper limb following nontraumatic intracerebral hemorrhage affecting left non-dominant side  |
| History of stroke | I69139 | Monoplegia of upper limb following nontraumatic intracerebral hemorrhage affecting unspecified side        |
| History of stroke | I6914  | Monoplegia of lower limb following nontraumatic intracerebral hemorrhage                                   |
| History of stroke | I69141 | Monoplegia of lower limb following nontraumatic intracerebral hemorrhage affecting right dominant side     |
| History of stroke | I69142 | Monoplegia of lower limb following nontraumatic intracerebral hemorrhage affecting left dominant side      |
| History of stroke | I69143 | Monoplegia of lower limb following nontraumatic intracerebral hemorrhage affecting right non-dominant side |
| History of stroke | I69144 | Monoplegia of lower limb following nontraumatic intracerebral hemorrhage affecting left non-dominant side  |
| History of stroke | I69149 | Monoplegia of lower limb following nontraumatic intracerebral hemorrhage affecting unspecified side        |
| History of stroke | I6915  | Hemiplegia and hemiparesis following nontraumatic intracerebral hemorrhage                                 |
| History of stroke | I69151 | Hemiplegia and hemiparesis following nontraumatic intracerebral hemorrhage affecting right dominant side   |
| History of stroke | I69152 | Hemiplegia and hemiparesis following nontraumatic intracerebral hemorrhage affecting left dominant side    |

|                   |        |                                                                                                                 |
|-------------------|--------|-----------------------------------------------------------------------------------------------------------------|
| History of stroke | I69153 | Hemiplegia and hemiparesis following nontraumatic intracerebral hemorrhage affecting right non-dominant side    |
| History of stroke | I69154 | Hemiplegia and hemiparesis following nontraumatic intracerebral hemorrhage affecting left non-dominant side     |
| History of stroke | I69159 | Hemiplegia and hemiparesis following nontraumatic intracerebral hemorrhage affecting unspecified side           |
| History of stroke | I6916  | Other paralytic syndrome following nontraumatic intracerebral hemorrhage                                        |
| History of stroke | I69161 | Other paralytic syndrome following nontraumatic intracerebral hemorrhage affecting right dominant side          |
| History of stroke | I69162 | Other paralytic syndrome following nontraumatic intracerebral hemorrhage affecting left dominant side           |
| History of stroke | I69163 | Other paralytic syndrome following nontraumatic intracerebral hemorrhage affecting right non-dominant side      |
| History of stroke | I69164 | Other paralytic syndrome following nontraumatic intracerebral hemorrhage affecting left non-dominant side       |
| History of stroke | I69165 | Other paralytic syndrome following nontraumatic intracerebral hemorrhage, bilateral                             |
| History of stroke | I69169 | Other paralytic syndrome following nontraumatic intracerebral hemorrhage affecting unspecified side             |
| History of stroke | I6919  | Other sequelae of nontraumatic intracerebral hemorrhage                                                         |
| History of stroke | I69190 | Apraxia following nontraumatic intracerebral hemorrhage                                                         |
| History of stroke | I69191 | Dysphagia following nontraumatic intracerebral hemorrhage                                                       |
| History of stroke | I69192 | Facial weakness following nontraumatic intracerebral hemorrhage                                                 |
| History of stroke | I69193 | Ataxia following nontraumatic intracerebral hemorrhage                                                          |
| History of stroke | I69198 | Other sequelae of nontraumatic intracerebral hemorrhage                                                         |
| History of stroke | I692   | Sequelae of other nontraumatic intracranial hemorrhage                                                          |
| History of stroke | I6920  | Unspecified sequelae of other nontraumatic intracranial hemorrhage                                              |
| History of stroke | I6921  | Cognitive deficits following other nontraumatic intracranial hemorrhage                                         |
| History of stroke | I6922  | Speech and language deficits following other nontraumatic intracranial hemorrhage                               |
| History of stroke | I69220 | Aphasia following other nontraumatic intracranial hemorrhage                                                    |
| History of stroke | I69221 | Dysphasia following other nontraumatic intracranial hemorrhage                                                  |
| History of stroke | I69222 | Dysarthria following other nontraumatic intracranial hemorrhage                                                 |
| History of stroke | I69223 | Fluency disorder following other nontraumatic intracranial hemorrhage                                           |
| History of stroke | I69228 | Other speech and language deficits following other nontraumatic intracranial hemorrhage                         |
| History of stroke | I6923  | Monoplegia of upper limb following other nontraumatic intracranial hemorrhage                                   |
| History of stroke | I69231 | Monoplegia of upper limb following other nontraumatic intracranial hemorrhage affecting right dominant side     |
| History of stroke | I69232 | Monoplegia of upper limb following other nontraumatic intracranial hemorrhage affecting left dominant side      |
| History of stroke | I69233 | Monoplegia of upper limb following other nontraumatic intracranial hemorrhage affecting right non-dominant side |
| History of stroke | I69234 | Monoplegia of upper limb following other nontraumatic intracranial hemorrhage affecting left non-dominant side  |
| History of stroke | I69239 | Monoplegia of upper limb following other nontraumatic intracranial hemorrhage affecting unspecified side        |
| History of stroke | I6924  | Monoplegia of lower limb following other nontraumatic intracranial hemorrhage                                   |
| History of stroke | I69241 | Monoplegia of lower limb following other nontraumatic intracranial hemorrhage affecting right dominant side     |
| History of stroke | I69242 | Monoplegia of lower limb following other nontraumatic intracranial hemorrhage affecting left dominant side      |
| History of stroke | I69243 | Monoplegia of lower limb following other nontraumatic intracranial hemorrhage affecting right non-dominant side |
| History of stroke | I69244 | Monoplegia of lower limb following other nontraumatic intracranial hemorrhage affecting left non-dominant side  |
| History of stroke | I69249 | Monoplegia of lower limb following other nontraumatic intracranial hemorrhage affecting unspecified side        |
| History of stroke | I6925  | Hemiplegia and hemiparesis following other nontraumatic intracranial hemorrhage                                 |

|                   |        |                                                                                                                   |
|-------------------|--------|-------------------------------------------------------------------------------------------------------------------|
| History of stroke | I69251 | Hemiplegia and hemiparesis following other nontraumatic intracranial hemorrhage affecting right dominant side     |
| History of stroke | I69252 | Hemiplegia and hemiparesis following other nontraumatic intracranial hemorrhage affecting left dominant side      |
| History of stroke | I69253 | Hemiplegia and hemiparesis following other nontraumatic intracranial hemorrhage affecting right non-dominant side |
| History of stroke | I69254 | Hemiplegia and hemiparesis following other nontraumatic intracranial hemorrhage affecting left non-dominant side  |
| History of stroke | I69259 | Hemiplegia and hemiparesis following other nontraumatic intracranial hemorrhage affecting unspecified side        |
| History of stroke | I6926  | Other paralytic syndrome following other nontraumatic intracranial hemorrhage                                     |
| History of stroke | I69261 | Other paralytic syndrome following other nontraumatic intracranial hemorrhage affecting right dominant side       |
| History of stroke | I69262 | Other paralytic syndrome following other nontraumatic intracranial hemorrhage affecting left dominant side        |
| History of stroke | I69263 | Other paralytic syndrome following other nontraumatic intracranial hemorrhage affecting right non-dominant side   |
| History of stroke | I69264 | Other paralytic syndrome following other nontraumatic intracranial hemorrhage affecting left non-dominant side    |
| History of stroke | I69265 | Other paralytic syndrome following other nontraumatic intracranial hemorrhage, bilateral                          |
| History of stroke | I69269 | Other paralytic syndrome following other nontraumatic intracranial hemorrhage affecting unspecified side          |
| History of stroke | I6929  | Other sequelae of other nontraumatic intracranial hemorrhage                                                      |
| History of stroke | I69290 | Apraxia following other nontraumatic intracranial hemorrhage                                                      |
| History of stroke | I69291 | Dysphagia following other nontraumatic intracranial hemorrhage                                                    |
| History of stroke | I69292 | Facial weakness following other nontraumatic intracranial hemorrhage                                              |
| History of stroke | I69293 | Ataxia following other nontraumatic intracranial hemorrhage                                                       |
| History of stroke | I69298 | Other sequelae of other nontraumatic intracranial hemorrhage                                                      |
| History of stroke | I693   | Sequelae of cerebral infarction                                                                                   |
| History of stroke | I6930  | Unspecified sequelae of cerebral infarction                                                                       |
| History of stroke | I6931  | Cognitive deficits following cerebral infarction                                                                  |
| History of stroke | I6932  | Speech and language deficits following cerebral infarction                                                        |
| History of stroke | I69320 | Aphasia following cerebral infarction                                                                             |
| History of stroke | I69321 | Dysphasia following cerebral infarction                                                                           |
| History of stroke | I69322 | Dysarthria following cerebral infarction                                                                          |
| History of stroke | I69323 | Fluency disorder following cerebral infarction                                                                    |
| History of stroke | I69328 | Other speech and language deficits following cerebral infarction                                                  |
| History of stroke | I6933  | Monoplegia of upper limb following cerebral infarction                                                            |
| History of stroke | I69331 | Monoplegia of upper limb following cerebral infarction affecting right dominant side                              |
| History of stroke | I69332 | Monoplegia of upper limb following cerebral infarction affecting left dominant side                               |
| History of stroke | I69333 | Monoplegia of upper limb following cerebral infarction affecting right non-dominant side                          |
| History of stroke | I69334 | Monoplegia of upper limb following cerebral infarction affecting left non-dominant side                           |
| History of stroke | I69339 | Monoplegia of upper limb following cerebral infarction affecting unspecified side                                 |
| History of stroke | I6934  | Monoplegia of lower limb following cerebral infarction                                                            |
| History of stroke | I69341 | Monoplegia of lower limb following cerebral infarction affecting right dominant side                              |
| History of stroke | I69342 | Monoplegia of lower limb following cerebral infarction affecting left dominant side                               |
| History of stroke | I69343 | Monoplegia of lower limb following cerebral infarction affecting right non-dominant side                          |
| History of stroke | I69344 | Monoplegia of lower limb following cerebral infarction affecting left non-dominant side                           |
| History of stroke | I69349 | Monoplegia of lower limb following cerebral infarction affecting unspecified side                                 |
| History of stroke | I6935  | Hemiplegia and hemiparesis following cerebral infarction                                                          |

|                   |        |                                                                                                    |
|-------------------|--------|----------------------------------------------------------------------------------------------------|
| History of stroke | I69351 | Hemiplegia and hemiparesis following cerebral infarction affecting right dominant side             |
| History of stroke | I69352 | Hemiplegia and hemiparesis following cerebral infarction affecting left dominant side              |
| History of stroke | I69353 | Hemiplegia and hemiparesis following cerebral infarction affecting right non-dominant side         |
| History of stroke | I69354 | Hemiplegia and hemiparesis following cerebral infarction affecting left non-dominant side          |
| History of stroke | I69359 | Hemiplegia and hemiparesis following cerebral infarction affecting unspecified side                |
| History of stroke | I6936  | Other paralytic syndrome following cerebral infarction                                             |
| History of stroke | I69361 | Other paralytic syndrome following cerebral infarction affecting right dominant side               |
| History of stroke | I69362 | Other paralytic syndrome following cerebral infarction affecting left dominant side                |
| History of stroke | I69363 | Other paralytic syndrome following cerebral infarction affecting right non-dominant side           |
| History of stroke | I69364 | Other paralytic syndrome following cerebral infarction affecting left non-dominant side            |
| History of stroke | I69365 | Other paralytic syndrome following cerebral infarction, bilateral                                  |
| History of stroke | I69369 | Other paralytic syndrome following cerebral infarction affecting unspecified side                  |
| History of stroke | I6939  | Other sequelae of cerebral infarction                                                              |
| History of stroke | I69390 | Apraxia following cerebral infarction                                                              |
| History of stroke | I69391 | Dysphagia following cerebral infarction                                                            |
| History of stroke | I69392 | Facial weakness following cerebral infarction                                                      |
| History of stroke | I69393 | Ataxia following cerebral infarction                                                               |
| History of stroke | I69398 | Other sequelae of cerebral infarction                                                              |
| History of stroke | I698   | Sequelae of other cerebrovascular diseases                                                         |
| History of stroke | I6980  | Unspecified sequelae of other cerebrovascular disease                                              |
| History of stroke | I6981  | Cognitive deficits following other cerebrovascular disease                                         |
| History of stroke | I6982  | Speech and language deficits following other cerebrovascular disease                               |
| History of stroke | I69820 | Aphasia following other cerebrovascular disease                                                    |
| History of stroke | I69821 | Dysphasia following other cerebrovascular disease                                                  |
| History of stroke | I69822 | Dysarthria following other cerebrovascular disease                                                 |
| History of stroke | I69823 | Fluency disorder following other cerebrovascular disease                                           |
| History of stroke | I69828 | Other speech and language deficits following other cerebrovascular disease                         |
| History of stroke | I6983  | Monoplegia of upper limb following other cerebrovascular disease                                   |
| History of stroke | I69831 | Monoplegia of upper limb following other cerebrovascular disease affecting right dominant side     |
| History of stroke | I69832 | Monoplegia of upper limb following other cerebrovascular disease affecting left dominant side      |
| History of stroke | I69833 | Monoplegia of upper limb following other cerebrovascular disease affecting right non-dominant side |
| History of stroke | I69834 | Monoplegia of upper limb following other cerebrovascular disease affecting left non-dominant side  |
| History of stroke | I69839 | Monoplegia of upper limb following other cerebrovascular disease affecting unspecified side        |
| History of stroke | I6984  | Monoplegia of lower limb following other cerebrovascular disease                                   |
| History of stroke | I69841 | Monoplegia of lower limb following other cerebrovascular disease affecting right dominant side     |
| History of stroke | I69842 | Monoplegia of lower limb following other cerebrovascular disease affecting left dominant side      |
| History of stroke | I69843 | Monoplegia of lower limb following other cerebrovascular disease affecting right non-dominant side |
| History of stroke | I69844 | Monoplegia of lower limb following other cerebrovascular disease affecting left non-dominant side  |
| History of stroke | I69849 | Monoplegia of lower limb following other cerebrovascular disease affecting unspecified side        |
| History of stroke | I6985  | Hemiplegia and hemiparesis following other cerebrovascular disease                                 |

|                   |        |                                                                                                          |
|-------------------|--------|----------------------------------------------------------------------------------------------------------|
| History of stroke | I69851 | Hemiplegia and hemiparesis following other cerebrovascular disease affecting right dominant side         |
| History of stroke | I69852 | Hemiplegia and hemiparesis following other cerebrovascular disease affecting left dominant side          |
| History of stroke | I69853 | Hemiplegia and hemiparesis following other cerebrovascular disease affecting right non-dominant side     |
| History of stroke | I69854 | Hemiplegia and hemiparesis following other cerebrovascular disease affecting left non-dominant side      |
| History of stroke | I69859 | Hemiplegia and hemiparesis following other cerebrovascular disease affecting unspecified side            |
| History of stroke | I6986  | Other paralytic syndrome following other cerebrovascular disease                                         |
| History of stroke | I69861 | Other paralytic syndrome following other cerebrovascular disease affecting right dominant side           |
| History of stroke | I69862 | Other paralytic syndrome following other cerebrovascular disease affecting left dominant side            |
| History of stroke | I69863 | Other paralytic syndrome following other cerebrovascular disease affecting right non-dominant side       |
| History of stroke | I69864 | Other paralytic syndrome following other cerebrovascular disease affecting left non-dominant side        |
| History of stroke | I69865 | Other paralytic syndrome following other cerebrovascular disease, bilateral                              |
| History of stroke | I69869 | Other paralytic syndrome following other cerebrovascular disease affecting unspecified side              |
| History of stroke | I6989  | Other sequelae of other cerebrovascular disease                                                          |
| History of stroke | I69890 | Apraxia following other cerebrovascular disease                                                          |
| History of stroke | I69891 | Dysphagia following other cerebrovascular disease                                                        |
| History of stroke | I69892 | Facial weakness following other cerebrovascular disease                                                  |
| History of stroke | I69893 | Ataxia following other cerebrovascular disease                                                           |
| History of stroke | I69898 | Other sequelae of other cerebrovascular disease                                                          |
| History of stroke | I699   | Sequelae of unspecified cerebrovascular diseases                                                         |
| History of stroke | I6990  | Unspecified sequelae of unspecified cerebrovascular disease                                              |
| History of stroke | I6991  | Cognitive deficits following unspecified cerebrovascular disease                                         |
| History of stroke | I6992  | Speech and language deficits following unspecified cerebrovascular disease                               |
| History of stroke | I69920 | Aphasia following unspecified cerebrovascular disease                                                    |
| History of stroke | I69921 | Dysphasia following unspecified cerebrovascular disease                                                  |
| History of stroke | I69922 | Dysarthria following unspecified cerebrovascular disease                                                 |
| History of stroke | I69923 | Fluency disorder following unspecified cerebrovascular disease                                           |
| History of stroke | I69928 | Other speech and language deficits following unspecified cerebrovascular disease                         |
| History of stroke | I6993  | Monoplegia of upper limb following unspecified cerebrovascular disease                                   |
| History of stroke | I69931 | Monoplegia of upper limb following unspecified cerebrovascular disease affecting right dominant side     |
| History of stroke | I69932 | Monoplegia of upper limb following unspecified cerebrovascular disease affecting left dominant side      |
| History of stroke | I69933 | Monoplegia of upper limb following unspecified cerebrovascular disease affecting right non-dominant side |
| History of stroke | I69934 | Monoplegia of upper limb following unspecified cerebrovascular disease affecting left non-dominant side  |
| History of stroke | I69939 | Monoplegia of upper limb following unspecified cerebrovascular disease affecting unspecified side        |
| History of stroke | I6994  | Monoplegia of lower limb following unspecified cerebrovascular disease                                   |
| History of stroke | I69941 | Monoplegia of lower limb following unspecified cerebrovascular disease affecting right dominant side     |
| History of stroke | I69942 | Monoplegia of lower limb following unspecified cerebrovascular disease affecting left dominant side      |
| History of stroke | I69943 | Monoplegia of lower limb following unspecified cerebrovascular disease affecting right non-dominant side |
| History of stroke | I69944 | Monoplegia of lower limb following unspecified cerebrovascular disease affecting left non-dominant side  |
| History of stroke | I69949 | Monoplegia of lower limb following unspecified cerebrovascular disease affecting unspecified side        |
| History of stroke | I6995  | Hemiplegia and hemiparesis following unspecified cerebrovascular disease                                 |

|                       |        |                                                                                                                                                                 |
|-----------------------|--------|-----------------------------------------------------------------------------------------------------------------------------------------------------------------|
| History of stroke     | I69951 | Hemiplegia and hemiparesis following unspecified cerebrovascular disease affecting right dominant side                                                          |
| History of stroke     | I69952 | Hemiplegia and hemiparesis following unspecified cerebrovascular disease affecting left dominant side                                                           |
| History of stroke     | I69953 | Hemiplegia and hemiparesis following unspecified cerebrovascular disease affecting right non-dominant side                                                      |
| History of stroke     | I69954 | Hemiplegia and hemiparesis following unspecified cerebrovascular disease affecting left non-dominant side                                                       |
| History of stroke     | I69959 | Hemiplegia and hemiparesis following unspecified cerebrovascular disease affecting unspecified side                                                             |
| History of stroke     | I6996  | Other paralytic syndrome following unspecified cerebrovascular disease                                                                                          |
| History of stroke     | I69961 | Other paralytic syndrome following unspecified cerebrovascular disease affecting right dominant side                                                            |
| History of stroke     | I69962 | Other paralytic syndrome following unspecified cerebrovascular disease affecting left dominant side                                                             |
| History of stroke     | I69963 | Other paralytic syndrome following unspecified cerebrovascular disease affecting right non-dominant side                                                        |
| History of stroke     | I69964 | Other paralytic syndrome following unspecified cerebrovascular disease affecting left non-dominant side                                                         |
| History of stroke     | I69965 | Other paralytic syndrome following unspecified cerebrovascular disease, bilateral                                                                               |
| History of stroke     | I69969 | Other paralytic syndrome following unspecified cerebrovascular disease affecting unspecified side                                                               |
| History of stroke     | I6999  | Other sequelae of unspecified cerebrovascular disease                                                                                                           |
| History of stroke     | I69990 | Apraxia following unspecified cerebrovascular disease                                                                                                           |
| History of stroke     | I69991 | Dysphagia following unspecified cerebrovascular disease                                                                                                         |
| History of stroke     | I69992 | Facial weakness following unspecified cerebrovascular disease                                                                                                   |
| History of stroke     | I69993 | Ataxia following unspecified cerebrovascular disease                                                                                                            |
| History of stroke     | I69998 | Other sequelae following unspecified cerebrovascular disease                                                                                                    |
| Arterial hypertension | I10    | Essential (primary) hypertension                                                                                                                                |
| Arterial hypertension | I11    | Hypertensive heart disease                                                                                                                                      |
| Arterial hypertension | I110   | Hypertensive heart disease with heart failure                                                                                                                   |
| Arterial hypertension | I119   | Hypertensive heart disease without heart failure                                                                                                                |
| Arterial hypertension | I12    | Hypertensive chronic kidney disease                                                                                                                             |
| Arterial hypertension | I120   | Hypertensive chronic kidney disease with stage 5 chronic kidney disease or end stage renal disease                                                              |
| Arterial hypertension | I129   | Hypertensive chronic kidney disease with stage 1 through stage 4 chronic kidney disease, or unspecified chronic kidney disease                                  |
| Arterial hypertension | I13    | Hypertensive heart and chronic kidney disease                                                                                                                   |
| Arterial hypertension | I130   | Hypertensive heart and chronic kidney disease with heart failure and stage 1 through stage 4 chronic kidney disease, or unspecified chronic kidney disease      |
| Arterial hypertension | I131   | Hypertensive heart and chronic kidney disease without heart failure                                                                                             |
| Arterial hypertension | I1310  | Hypertensive heart and chronic kidney disease without heart failure, with stage 1 through stage 4 chronic kidney disease, or unspecified chronic kidney disease |
| Arterial hypertension | I1311  | Hypertensive heart and chronic kidney disease without heart failure, with stage 5 chronic kidney disease, or end stage renal disease                            |
| Arterial hypertension | I132   | Hypertensive heart and chronic kidney disease with heart failure and with stage 5 chronic kidney disease, or end stage renal disease                            |
| Arterial hypertension | I15    | Secondary hypertension                                                                                                                                          |
| Arterial hypertension | I150   | Renovascular hypertension                                                                                                                                       |
| Arterial hypertension | I151   | Hypertension secondary to other renal disorders                                                                                                                 |
| Arterial hypertension | I152   | Hypertension secondary to endocrine disorders                                                                                                                   |



|                       |        |                                                                                                         |
|-----------------------|--------|---------------------------------------------------------------------------------------------------------|
| Arterial hypertension | I158   | Other secondary hypertension                                                                            |
| Arterial hypertension | I159   | Secondary hypertension, unspecified                                                                     |
| Former smoker         | F1720  | Tobacco dependence syndrome, currently abstinent                                                        |
| Former smoker         | F1721  | Tobacco dependence syndrome, currently abstinent but in a protected environment                         |
| Former smoker         | F1722  | Tobacco dependence syndrome, currently on a maintenance or substitution diet under medical supervision  |
| Former smoker         | F1723  | Tobacco dependence syndrome, currently abstinent, but taking aversive or blocking medications           |
| Former smoker         | Z864   | Personal history of substance abuse (former smoker)                                                     |
| Current smoker        | F170   | Mental and behavioral disorders related to tobacco use: acute intoxication                              |
| Current smoker        | F1700  | Mental and behavioural disorders due to acute tobacco intoxication without complications                |
| Current smoker        | F1701  | Mental and behavioural disorders due to acute tobacco intoxication with trauma or other physical injury |
| Current smoker        | F1702  | Mental and behavioral disorders due to acute tobacco intoxication with other medical complications      |
| Current smoker        | F1703  | Mental and behavioral disorders due to acute tobacco intoxication, with delirium                        |
| Current smoker        | F1704  | Mental and behavioral disorders due to acute tobacco intoxication, with perceptual distortion           |
| Current smoker        | F1705  | Mental and behavioural disorders due to acute tobacco intoxication, with coma                           |
| Current smoker        | F1706  | Mental and behavioural disorders due to acute tobacco intoxication, with convulsions                    |
| Current smoker        | F1707  | Mental and behavioural disorders due to acute pathological tobacco intoxication                         |
| Current smoker        | F171   | Mental and behavioural disorders related to tobacco use: harmful use                                    |
| Current smoker        | F1724  | Tobacco dependence syndrome, current use                                                                |
| Current smoker        | F17240 | Tobacco dependence syndrome, current use, no physical symptoms                                          |
| Current smoker        | F17241 | Tobacco dependence syndrome, current use, with physical symptoms                                        |
| Current smoker        | F1725  | Tobacco dependence syndrome, ongoing use                                                                |
| Current smoker        | F1726  | Tobacco dependence syndrome, episodic use                                                               |
| Current smoker        | F173   | Mental and behavioral disorders related to tobacco use: withdrawal syndrome                             |
| Current smoker        | F1730  | Smoking withdrawal syndrome, uncomplicated                                                              |
| Current smoker        | F1731  | Smoking withdrawal syndrome, with seizures                                                              |
| Current smoker        | F174   | Mental and behavioural disorders related to tobacco use: withdrawal syndrome with delirium              |
| Current smoker        | F1740  | Smoking withdrawal syndrome with delirium, without convulsion                                           |
| Current smoker        | F1741  | Smoking withdrawal syndrome with delirium, with convulsions                                             |
| Current smoker        | F175   | Mental and behavioural disorders related to tobacco use: psychotic disorder                             |
| Current smoker        | F1750  | Psychotic disorder with schizophrenic features, due to tobacco use                                      |
| Current smoker        | F1751  | Psychotic disorder with delusions in the foreground, due to tobacco                                     |
| Current smoker        | F1752  | Psychotic disorder with prominent hallucinations due to tobacco                                         |
| Current smoker        | F1753  | Psychotic disorder with prominent polymorphic symptoms, due to smoking                                  |
| Current smoker        | F1754  | Psychotic disorder with prominent depressive symptoms due to smoking                                    |
| Current smoker        | F1755  | Psychotic disorder with manic symptoms in the foreground, due to smoking                                |
| Current smoker        | F1756  | Mixed psychotic disorder, due to smoking                                                                |
| Current smoker        | F176   | Mental and behavioural disorders related to tobacco use: amnesic syndrome                               |
| Current smoker        | F177   | Mental and behavioural disorders related to tobacco use: late-onset residual or psychotic disorder      |
| Current smoker        | F1770  | Flashbacks, due to smoking                                                                              |
| Current smoker        | F1771  | Residual or late-onset personality or behavioral disorder due to tobacco                                |
| Current smoker        | F1772  | Residual or late-onset psychotic disorder due to tobacco                                                |
| Current smoker        | F1773  | Dementia, due to smoking                                                                                |
| Current smoker        | F1774  | Other persistent or late-onset cognitive impairment due to tobacco                                      |
| Current smoker        | F1775  | Late-onset psychotic disorder, due to tobacco                                                           |
| Current smoker        | F178   | Other mental and behavioral disorders related to tobacco use                                            |

|                   |       |                                                                                                          |
|-------------------|-------|----------------------------------------------------------------------------------------------------------|
| Current smoker    | F179  | Unspecified mental and behavioral disorders related to tobacco use                                       |
| Current smoker    | T652  | Toxic effect of tobacco and nicotine                                                                     |
| Current smoker    | Z587  | Exposure to tobacco smoke                                                                                |
| Current smoker    | Z720  | Difficulties related to tobacco use (without abuse)                                                      |
| Dyslipidemia      | E78   | Disorders of lipoprotein metabolism and other lipidemias                                                 |
| Dyslipidemia      | E780  | Pure hypercholesterolemia                                                                                |
| Dyslipidemia      | E781  | Pure hyperglyceridemia                                                                                   |
| Dyslipidemia      | E782  | Mixed hyperlipidemia                                                                                     |
| Dyslipidemia      | E783  | Hyperchylomicronemia                                                                                     |
| Dyslipidemia      | E784  | Other hyperlipidemia                                                                                     |
| Dyslipidemia      | E785  | Hyperlipidemia, unspecified                                                                              |
| Dyslipidemia      | E786  | Lipoprotein deficiency                                                                                   |
| Dyslipidemia      | E788  | Other disorders of lipoprotein metabolism                                                                |
| Dyslipidemia      | E789  | Disorder of lipoprotein metabolism, unspecified                                                          |
| Diabetes mellitus | E10   | Type 1 diabetes mellitus                                                                                 |
| Diabetes mellitus | E101  | Type 1 diabetes mellitus with ketoacidosis                                                               |
| Diabetes mellitus | E102  | Type 1 diabetes mellitus with kidney complications                                                       |
| Diabetes mellitus | E103  | Type 1 diabetes mellitus with ophthalmic complications                                                   |
| Diabetes mellitus | E104  | Type 1 diabetes mellitus with neurological complications                                                 |
| Diabetes mellitus | E105  | Type 1 diabetes mellitus with circulatory complications                                                  |
| Diabetes mellitus | E106  | Type 1 diabetes mellitus with other specified complications                                              |
| Diabetes mellitus | E108  | Type 1 diabetes mellitus with unspecified complications                                                  |
| Diabetes mellitus | E109  | Type 1 diabetes mellitus without complications                                                           |
| Diabetes mellitus | E11   | Type 2 diabetes mellitus                                                                                 |
| Diabetes mellitus | E110  | Type 2 diabetes mellitus with hyperosmolarity                                                            |
| Diabetes mellitus | E1100 | Type 2 diabetes mellitus with hyperosmolarity without nonketotic hyperglycemic-hyperosmolar coma (NKHHC) |
| Diabetes mellitus | E112  | Type 2 diabetes mellitus with kidney complications                                                       |
| Diabetes mellitus | E113  | Type 2 diabetes mellitus with ophthalmic complications                                                   |
| Diabetes mellitus | E114  | Type 2 diabetes mellitus with neurological complications                                                 |
| Diabetes mellitus | E1140 | Type 2 diabetes mellitus with diabetic neuropathy, unspecified                                           |
| Diabetes mellitus | E115  | Type 2 diabetes mellitus with circulatory complications                                                  |
| Diabetes mellitus | E116  | Type 2 diabetes mellitus with other specified complications                                              |
| Diabetes mellitus | E118  | Type 2 diabetes mellitus with unspecified complications                                                  |
| Diabetes mellitus | E119  | Type 2 diabetes mellitus without complications                                                           |
| Diabetes mellitus | E13   | Other specified diabetes mellitus                                                                        |
| Diabetes mellitus | E130  | Other specified diabetes mellitus with hyperosmolarity                                                   |
| Diabetes mellitus | E131  | Other specified diabetes mellitus with ketoacidosis                                                      |
| Diabetes mellitus | E132  | Other specified diabetes mellitus with kidney complications                                              |
| Diabetes mellitus | E133  | Other specified diabetes mellitus with ophthalmic complications                                          |
| Diabetes mellitus | E134  | Other specified diabetes mellitus with neurological complications                                        |
| Diabetes mellitus | E135  | Other specified diabetes mellitus with circulatory complications                                         |
| Diabetes mellitus | E136  | Other specified diabetes mellitus with other specified complications                                     |
| Diabetes mellitus | E138  | Other specified diabetes mellitus with unspecified complications                                         |
| Diabetes mellitus | E139  | Other specified diabetes mellitus without complications                                                  |

## eMethods 2. List of CCAM (French Common Classification of Medical Procedures) Used for Outcomes Definitions

| Outcome                                   | CCAM code                             | Label                                                                                                                                                                                                   |                                                                          |
|-------------------------------------------|---------------------------------------|---------------------------------------------------------------------------------------------------------------------------------------------------------------------------------------------------------|--------------------------------------------------------------------------|
| Major amputation                          | NZFA002                               | Transtibial amputation                                                                                                                                                                                  |                                                                          |
|                                           | NZFA005                               | Amputation or disarticulation of the midfoot or forefoot, without stabilization of the hindfoot                                                                                                         |                                                                          |
|                                           | NZFA007                               | Transfemoral amputation                                                                                                                                                                                 |                                                                          |
|                                           | NZFA013                               | Amputation or disarticulation of the midfoot or forefoot, with stabilization of the hindfoot                                                                                                            |                                                                          |
| Peripheral endovascular revascularization | DGPF001                               | Percutaneous arterial desobstruction of the aortic bifurcation                                                                                                                                          |                                                                          |
|                                           | DGPF002                               | Recanalization of the aortic bifurcation with stenting by bilateral percutaneous arterial approach                                                                                                      |                                                                          |
|                                           | EDPF006                               | Recanalization of the common iliac artery and/or external iliac artery with covered stenting, by percutaneous arterial approach                                                                         |                                                                          |
|                                           | EDPF008                               | Recanalization of the common iliac artery and/or external iliac artery without stenting, by percutaneous arterial approach                                                                              |                                                                          |
|                                           | EDPF009                               | Recanalization of the common iliac artery and/or the external iliac artery with stenting, by percutaneous arterial approach                                                                             |                                                                          |
|                                           | EEAF001                               | Intraluminal dilatation of several arteries of the lower limb without stenting, by percutaneous arterial approach                                                                                       |                                                                          |
|                                           | EEAF002                               | Intraluminal dilatation of a lower limb artery with intraluminal dilatation of the common iliac artery and/or the homolateral external iliac artery with stenting, by percutaneous arterial approach    |                                                                          |
|                                           | EEAF003                               | Intraluminal dilatation of a lower limb artery without stenting, by percutaneous arterial approach                                                                                                      |                                                                          |
|                                           | EEAF004                               | Intraluminal dilatation of a lower limb artery with percutaneous arterial stenting                                                                                                                      |                                                                          |
|                                           | EEAF005                               | Intraluminal dilatation of a lower limb artery with intraluminal dilatation of the common iliac artery and/or the homolateral external iliac artery without stenting, by percutaneous arterial approach |                                                                          |
|                                           | EEAF006                               | Intraluminal dilatation of several arteries of the lower limb with stenting, by percutaneous arterial approach                                                                                          |                                                                          |
|                                           | EEJF001                               | Percutaneous arterial thromboaspiration of the artery or bypass of the lower limb                                                                                                                       |                                                                          |
|                                           | EENF001                               | Superselective in situ fibrinolysis of an artery or arterial bypass of the lower limb, by percutaneous arterial approach                                                                                |                                                                          |
|                                           | EENF002                               | Selective or superselective in situ fibrinolysis of an artery or an arterial bypass of the lower limb, by percutaneous arterial approach                                                                |                                                                          |
|                                           | EEPF001                               | Recanalization of a lower limb artery with percutaneous arterial stenting                                                                                                                               |                                                                          |
|                                           | EEPF002                               | Recanalization of a lower limb artery without stenting, by percutaneous arterial approach                                                                                                               |                                                                          |
|                                           | ENAF001                               | Intraluminal dilatation of a non-anatomic limb artery bypass graft with percutaneous arterial stenting                                                                                                  |                                                                          |
|                                           | ENAF002                               | Intraluminal dilatation of a non-anatomic limb artery bypass graft without stenting by percutaneous arterial approach                                                                                   |                                                                          |
|                                           | Peripheral surgical revascularization | DGFA001                                                                                                                                                                                                 | Thromboendarterectomy of the trunk of the abdominal aorta, by laparotomy |
|                                           |                                       | DGFA003                                                                                                                                                                                                 | Aortobiiliac thromboendarterectomy by laparotomy                         |
| DGFA004                                   |                                       | Thrombectomy of the abdominal aorta, common iliac artery and/or external iliac artery through bilateral inguino-femoral approach                                                                        |                                                                          |
| DGFA005                                   |                                       | Thrombectomy of a bypass or thromboendarterectomy of the abdominal aorta or its branches by laparotomy                                                                                                  |                                                                          |
| DGFA007                                   |                                       | Unilateral aorto-ilio-femoral thromboendarterectomy by laparotomy                                                                                                                                       |                                                                          |
| DGFA008                                   |                                       | Bilateral aorto-ilio-femoral thromboendarterectomy, by laparotomy                                                                                                                                       |                                                                          |
| DGFA009                                   |                                       | Unilateral aorto-iliac thromboendarterectomy, by laparotomy                                                                                                                                             |                                                                          |
| DGFA010                                   |                                       | Thrombectomy of the abdominal aorta, common iliac artery and/or external iliac artery by laparotomy                                                                                                     |                                                                          |

|         |                                                                                                                             |
|---------|-----------------------------------------------------------------------------------------------------------------------------|
| DGFA012 | Thrombectomy of a bypass or thromboendarterectomy of the abdominal aorta or its branches through a inguino-femoral approach |
| EDFA003 | Ilio-femoral thromboendarterectomy, by laparotomy                                                                           |
| EDFA006 | Iliac thromboendarterectomy, by laparotomy                                                                                  |
| EDFA007 | Iliofemoral thromboendarterectomy, by direct inguino-femoral approach                                                       |
| DGCA004 | Bifurcated aortobifemoral bypass, by laparotomy with infrarenal clamping                                                    |
| DGCA007 | Infrarenal aortaortic bypass by laparotomy, with infrarenal clamping                                                        |
| DGCA009 | Unilateral aortofemoral bypass, by laparotomy with infrarenal clamping                                                      |
| DGCA010 | Bifurcated aortobifemoral bypass surgery with suprarenal clamping                                                           |
| DGCA012 | Infrarenal aortaortic bypass by laparotomy, with suprarenal clamping                                                        |
| DGCA019 | Unilateral aortofemoral bypass, by laparotomy with suprarenal clamping                                                      |
| DGCA020 | Aorto-ilio-femoral bifurcated bypass surgery with suprarenal clamping                                                       |
| DGCA021 | Aortobirenal bypass surgery, by laparotomy                                                                                  |
| DGCA022 | Bifurcated aortobisilic bypass, by laparotomy with infrarenal clamping                                                      |
| DGCA026 | Bifurcated aortobisilic bypass, by laparotomy with suprarenal clamping                                                      |
| DGCA029 | Aorto-ilio-femoral bifurcated bypass surgery with infrarenal clamping                                                       |
| DGCA030 | Iterative bifurcated aortobifemoral bypass [redux] without prosthesis removal, by laparotomy                                |
| EDCA003 | Ilio-iliac, iliofemoral or femorofemoral artery bypass grafting using a direct approach                                     |
| EEFA001 | Thromboendarterectomy of the femoral artery and/or its branches, by direct approach                                         |
| EEFA002 | Thrombectomy of the lower limb artery, by popliteal approach                                                                |
| EEFA003 | Thromboendarterectomy of the popliteal artery, by direct approach                                                           |
| EEFA004 | Thrombectomy of the lower limb artery, by inguino-femoral approach                                                          |
| EDCA004 | Ilio-femoral arterial bypass for anastomotic complication on femoral bifurcation prosthesis, by direct approach             |
| EDCA005 | Homolateral iliofemoral artery bypass surgery, direct approach                                                              |
| EECA001 | Femoropopliteal artery bypass graft above the knee joint space using a direct approach                                      |
| EECA002 | Homolateral femorofemoral artery bypass surgery, direct approach                                                            |
| EECA003 | Femoropopliteal artery bypass below the knee joint space, using a direct approach                                           |
| EECA005 | Bypass surgery of a foot artery, by direct approach                                                                         |
| EECA006 | Subclaviofemoral or axillobifemoral arterial bypass through direct approach                                                 |
| EECA007 | Subclaviofemoral or axillofemoral arterial bypass through a direct approach                                                 |
| EECA008 | Femorotibial or femoroperoneal arterial bypass surgery without a venous collar, using a direct approach                     |
| EECA010 | Femorotibial or femoroperoneal arterial bypass with venous collar, by direct approach                                       |
| EECA012 | Multiple staged [sequential] or bifurcated bypass surgery of the lower limb arteries, using a direct approach               |
| EEAA002 | Enlargement angioplasty of a lower limb arterial bypass by direct approach                                                  |
