# Supplementary material for: Association of Lipoprotein(a) Levels With Incidence of Major Adverse Limb Events
Source: PubMed Central journal article supplement (PMC9856359; doi:10.1001/jamanetworkopen.2022.45720), 2022-12-08
Supplement: jamanetwopen-e2245720-s002.pdf [file jamanetwopen-e2245720-s002.pdf]

## Data Sharing Statement

Guédon. Association of Lipoprotein(a) Levels With Incidence of Major Adverse Limb Events. *JAMA Netw Open*. Published December 08, 2022. doi:10.1001/jamanetworkopen.2022.45720

### Data

**Data available:** Yes

**Data types:** Deidentified participant data, Data dictionary

**How to access data:** Data will be made available upon request to the corresponding author:  
[guillaume.goudot@gmail.com](mailto:guillaume.goudot@gmail.com)

**When available:** With publication

### Supporting Documents

**Document types:** None

### Additional Information

**Who can access the data:** Anyone requesting the data

**Types of analyses:** For a research purpose

**Mechanisms of data availability:** Data will be made available after a signed data access agreement
